# Supplementary material
Source: bioRxiv or medRxiv preprint supplement (https://www.biorxiv.org/content/biorxiv/early/2020/04/25/2020.04.25.058891.1/DC1/embed/media-1.pdf)

# Chr1.pdf

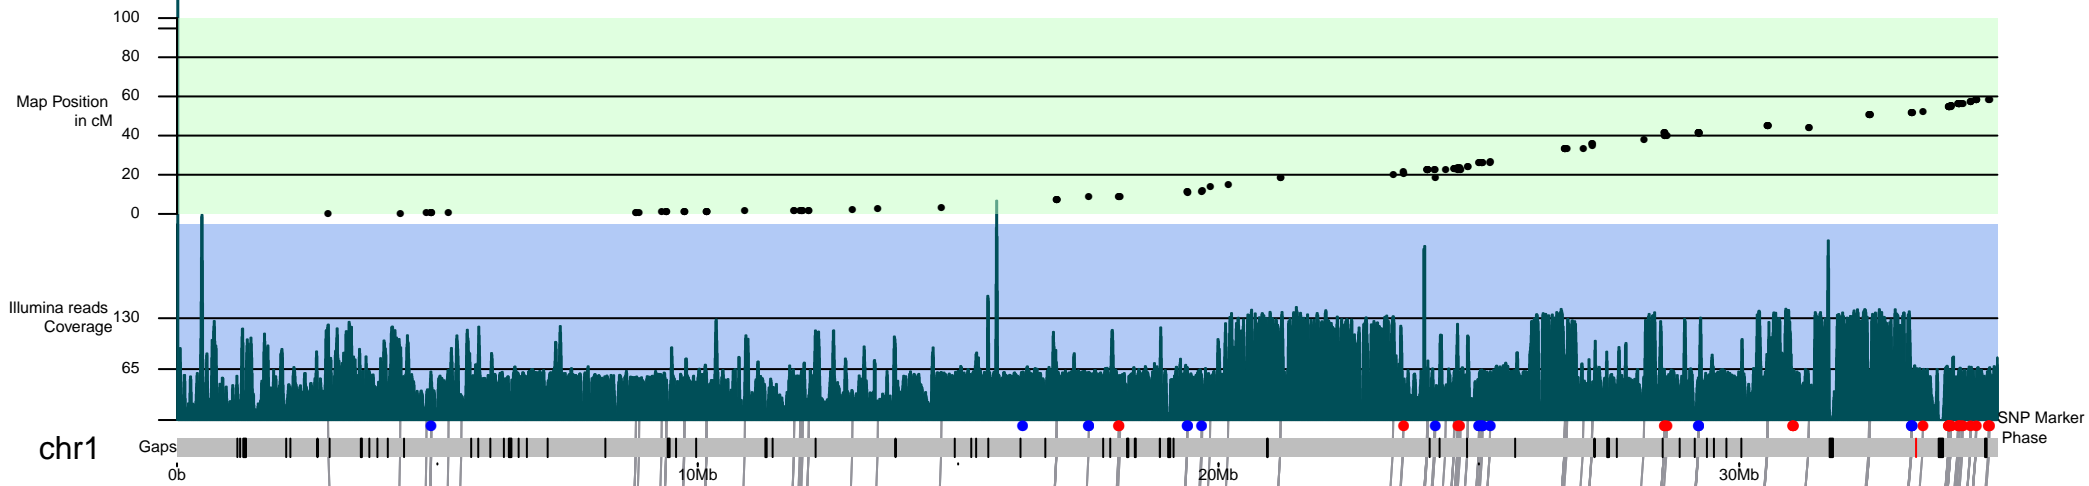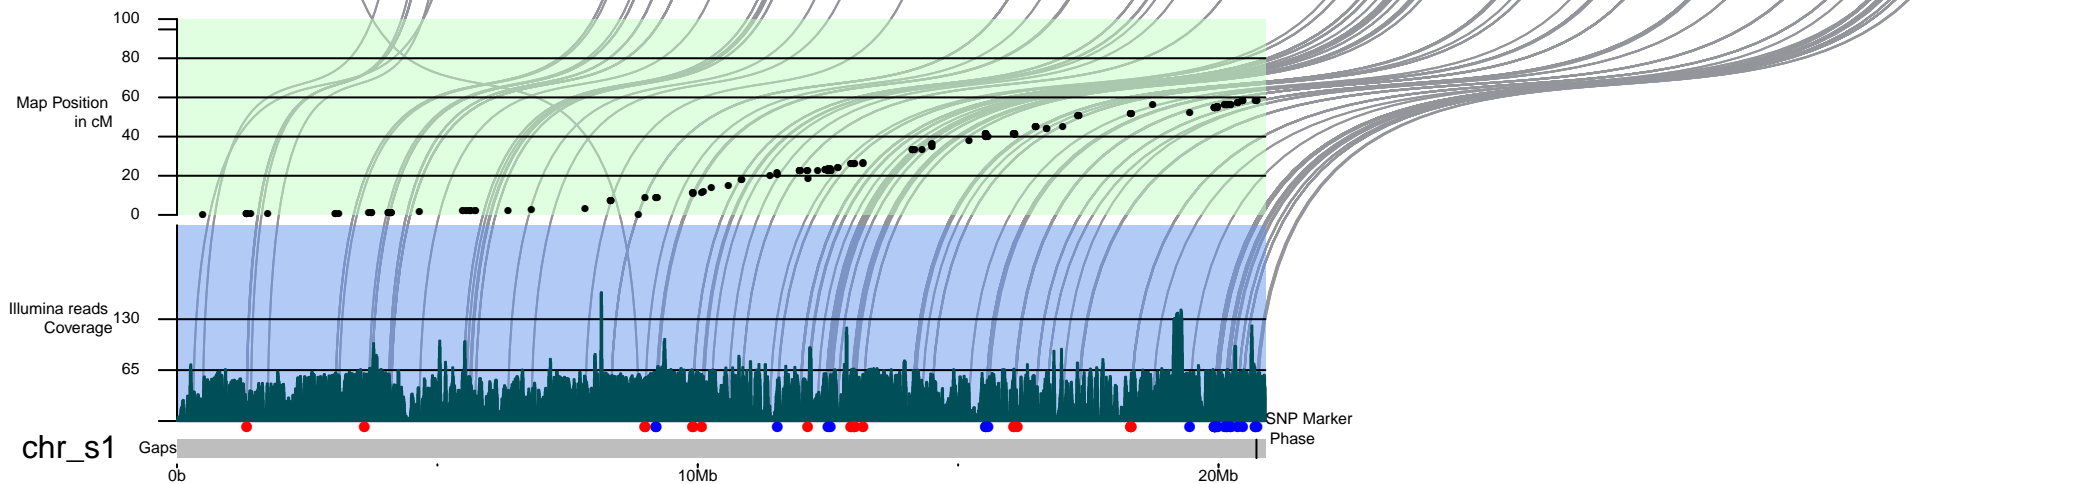

# Chr2.pdf

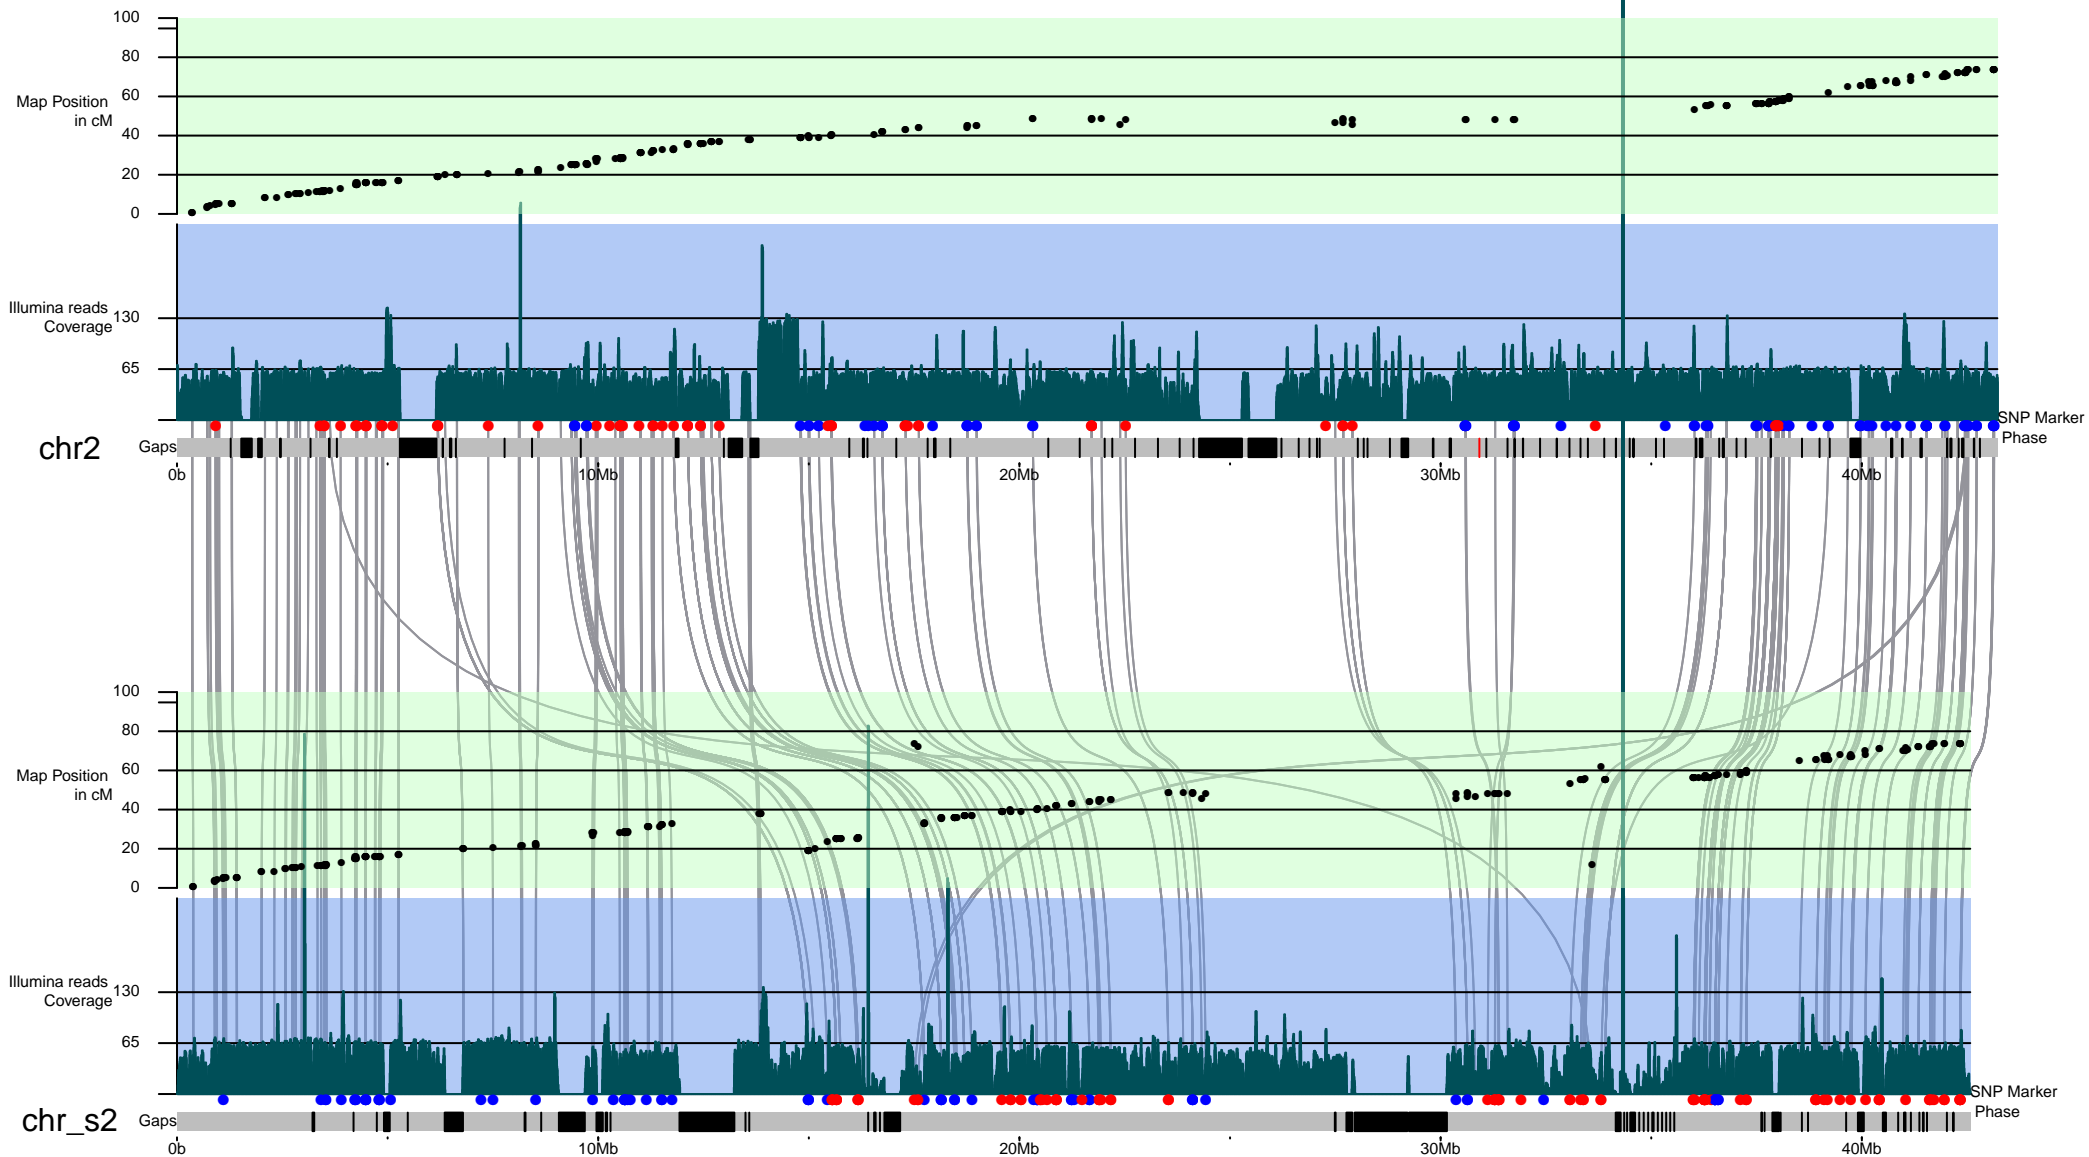

# Chr3.pdf

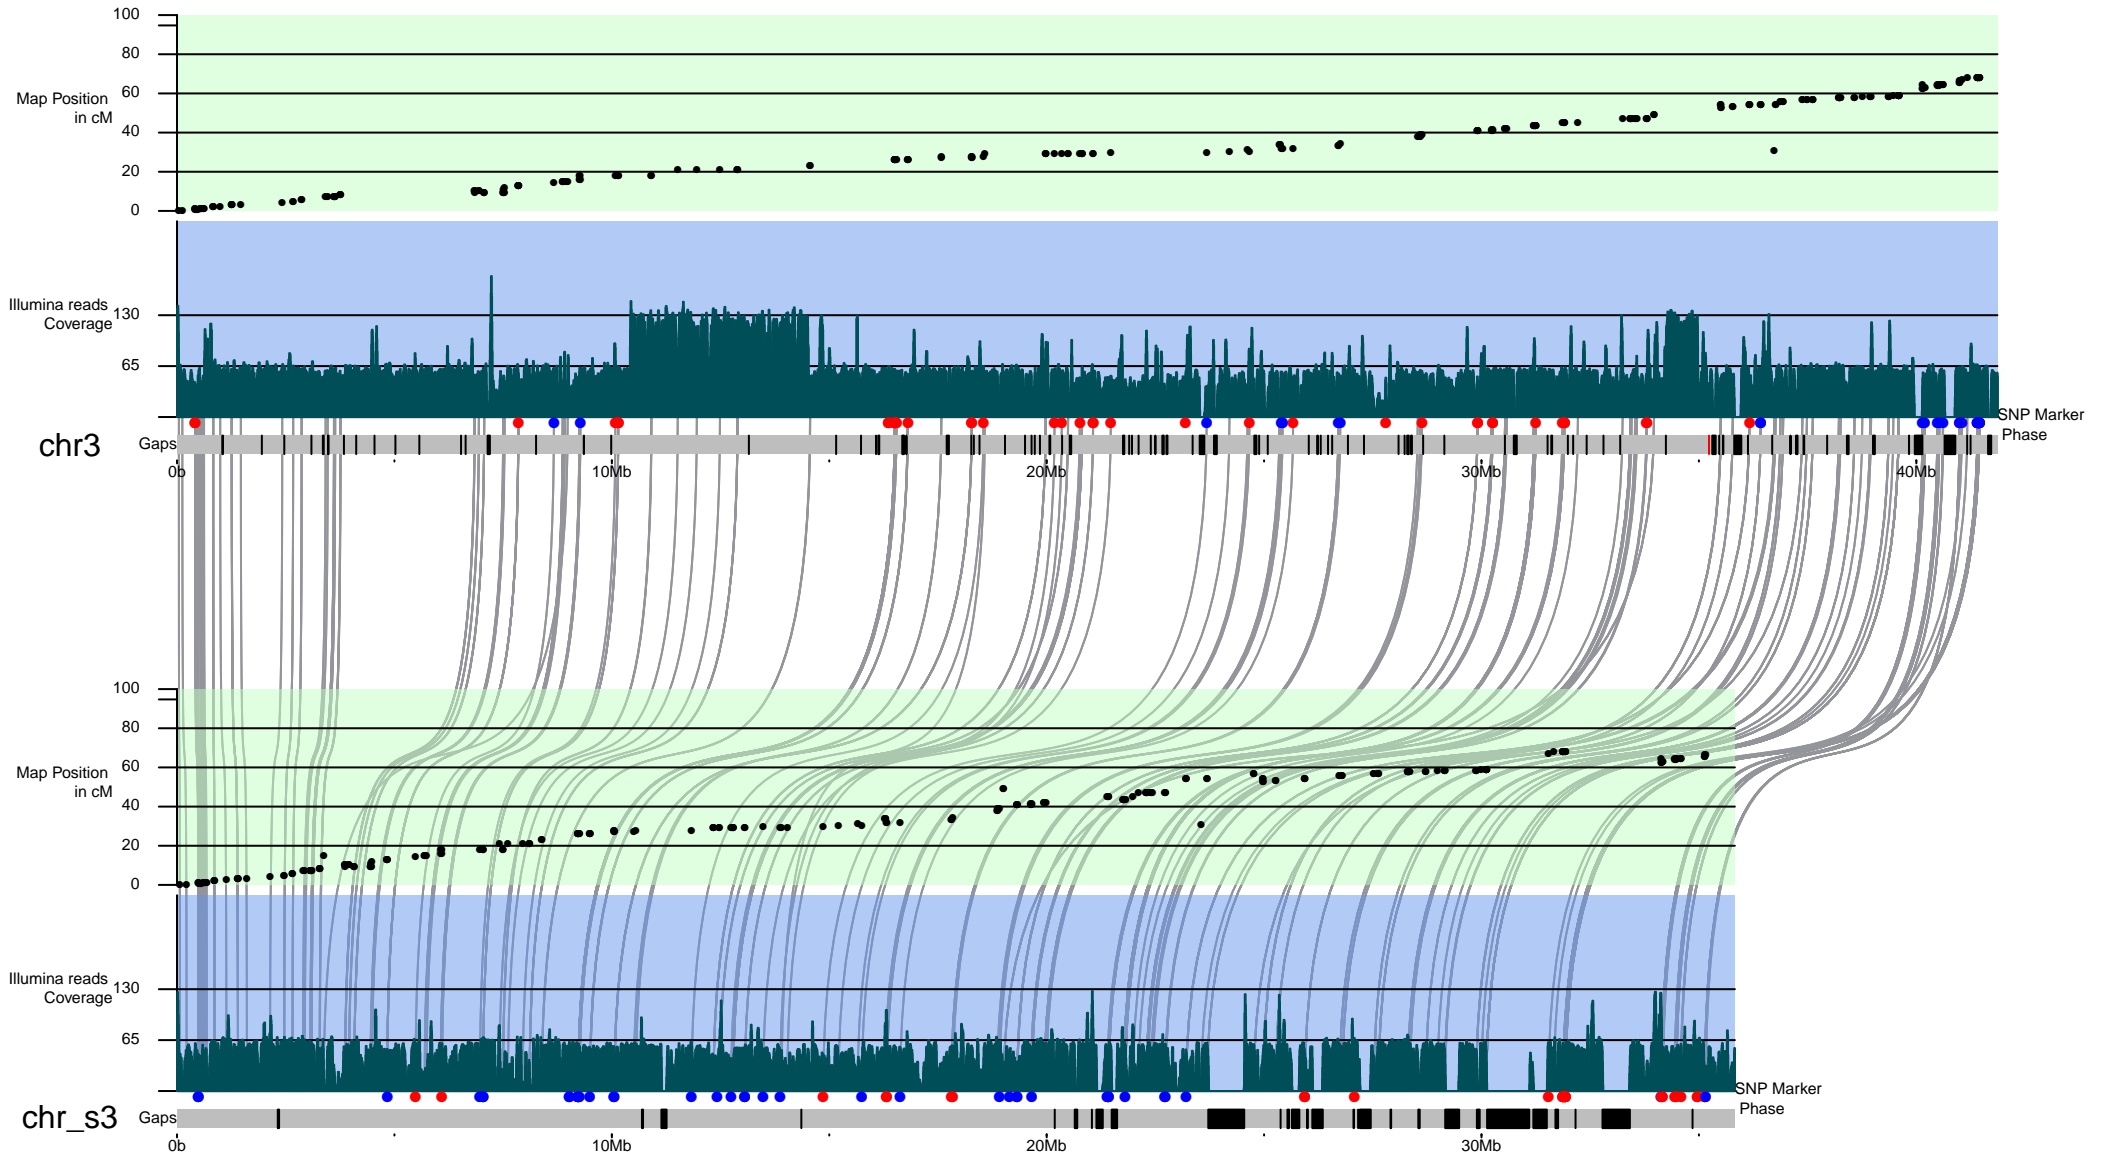

# Chr4.pdf

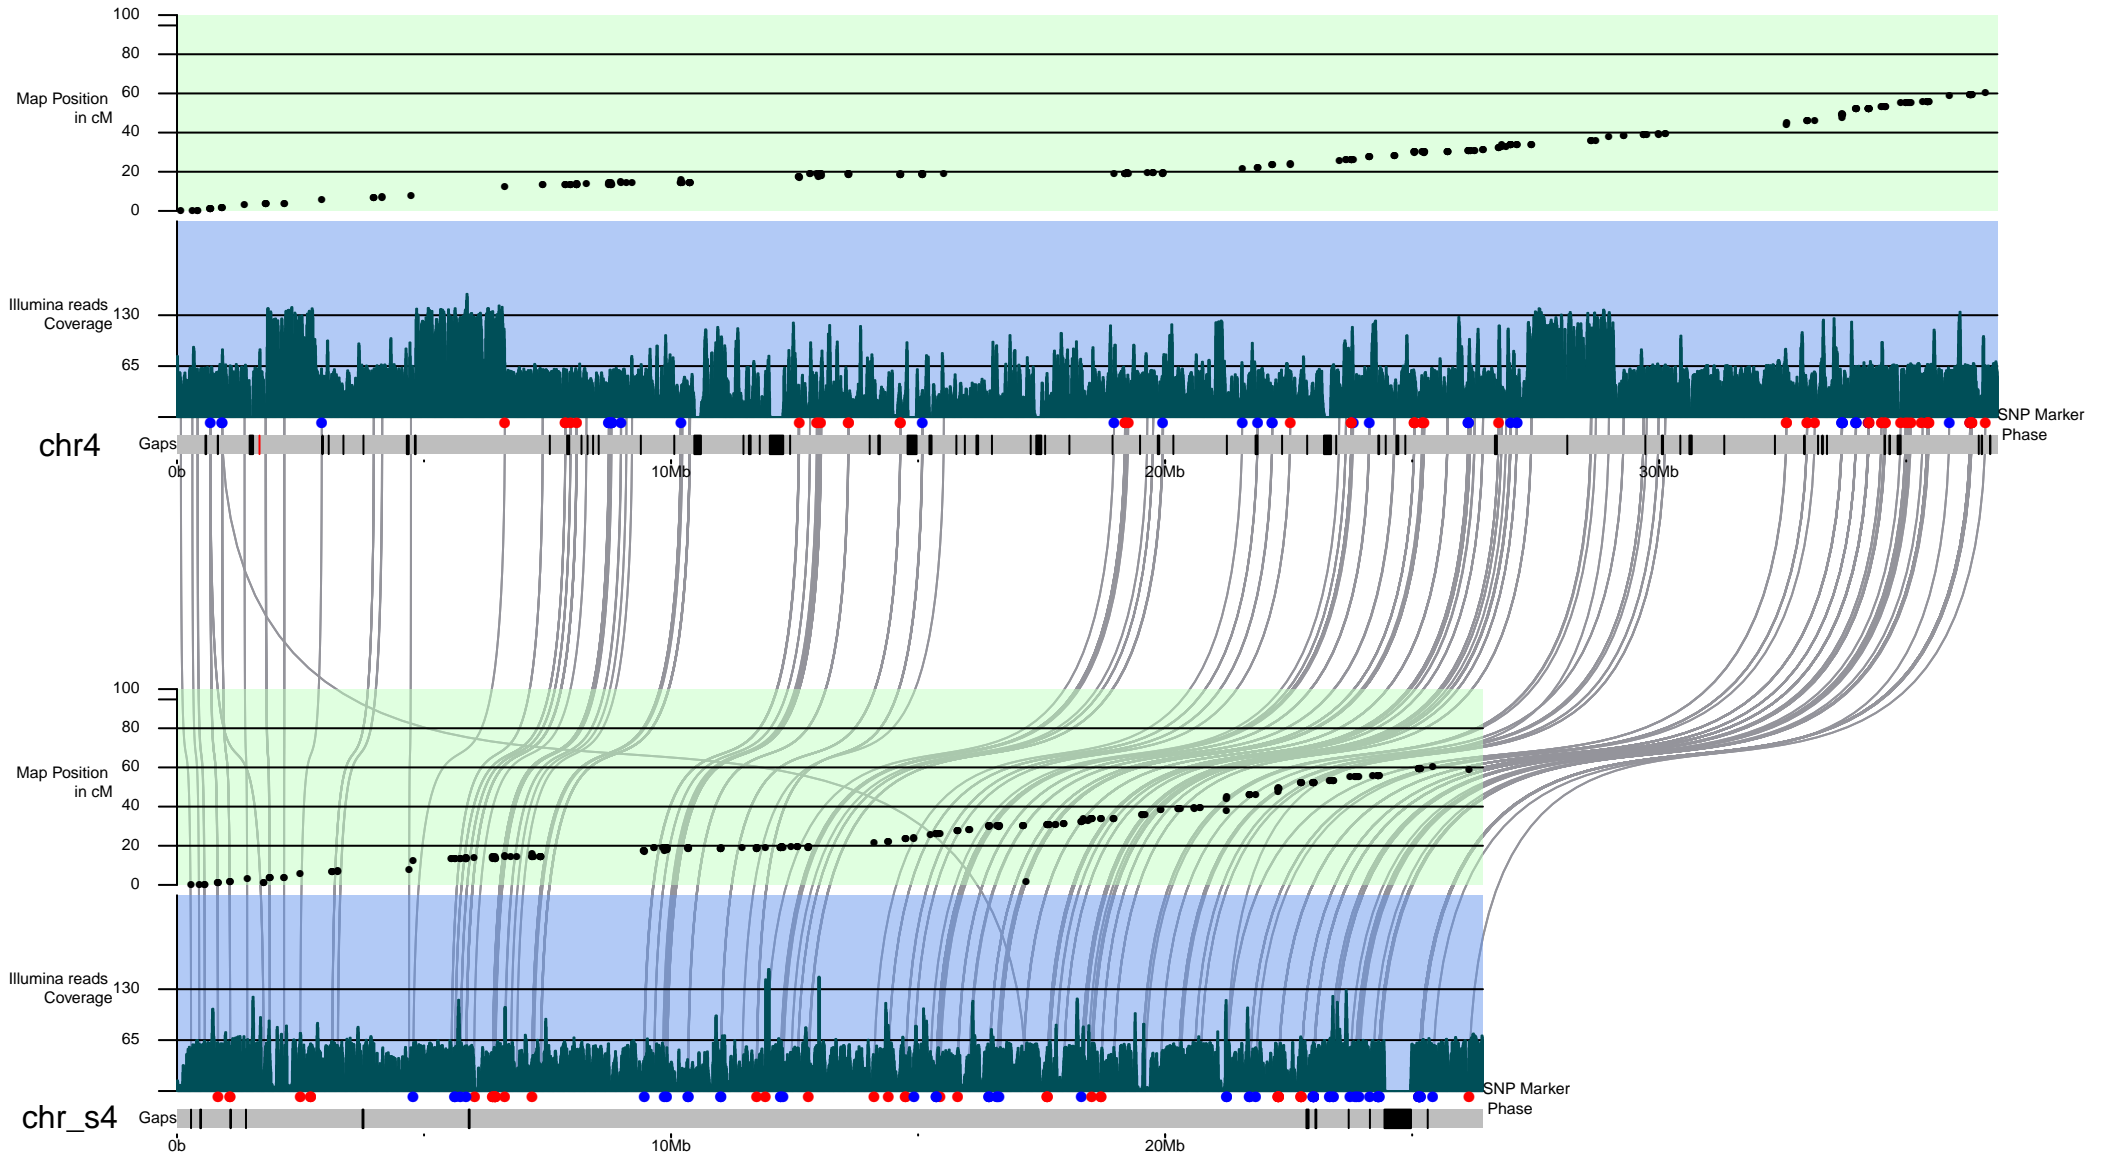

# Chr5.pdf

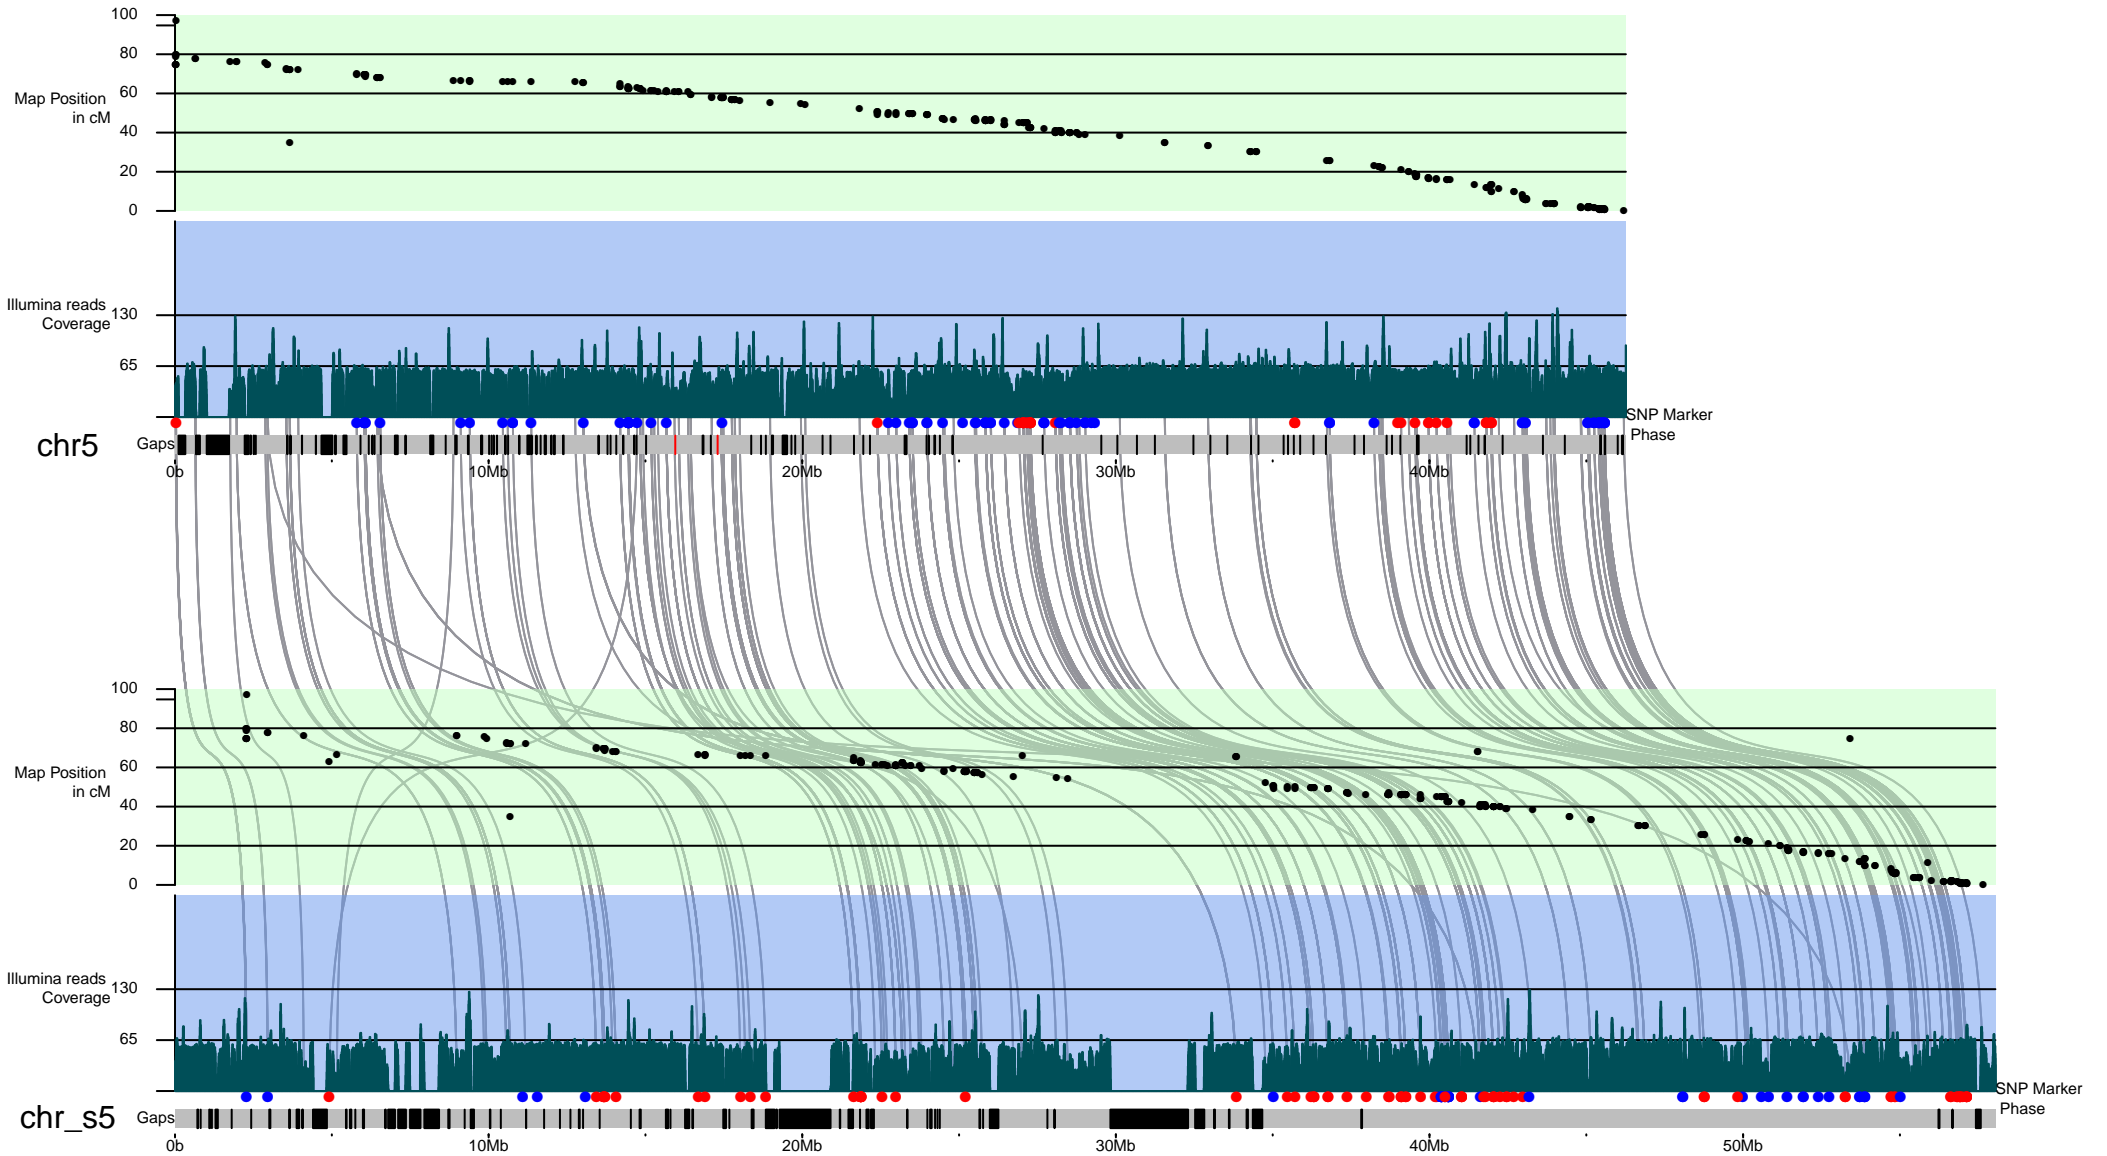

Chr6.pdf

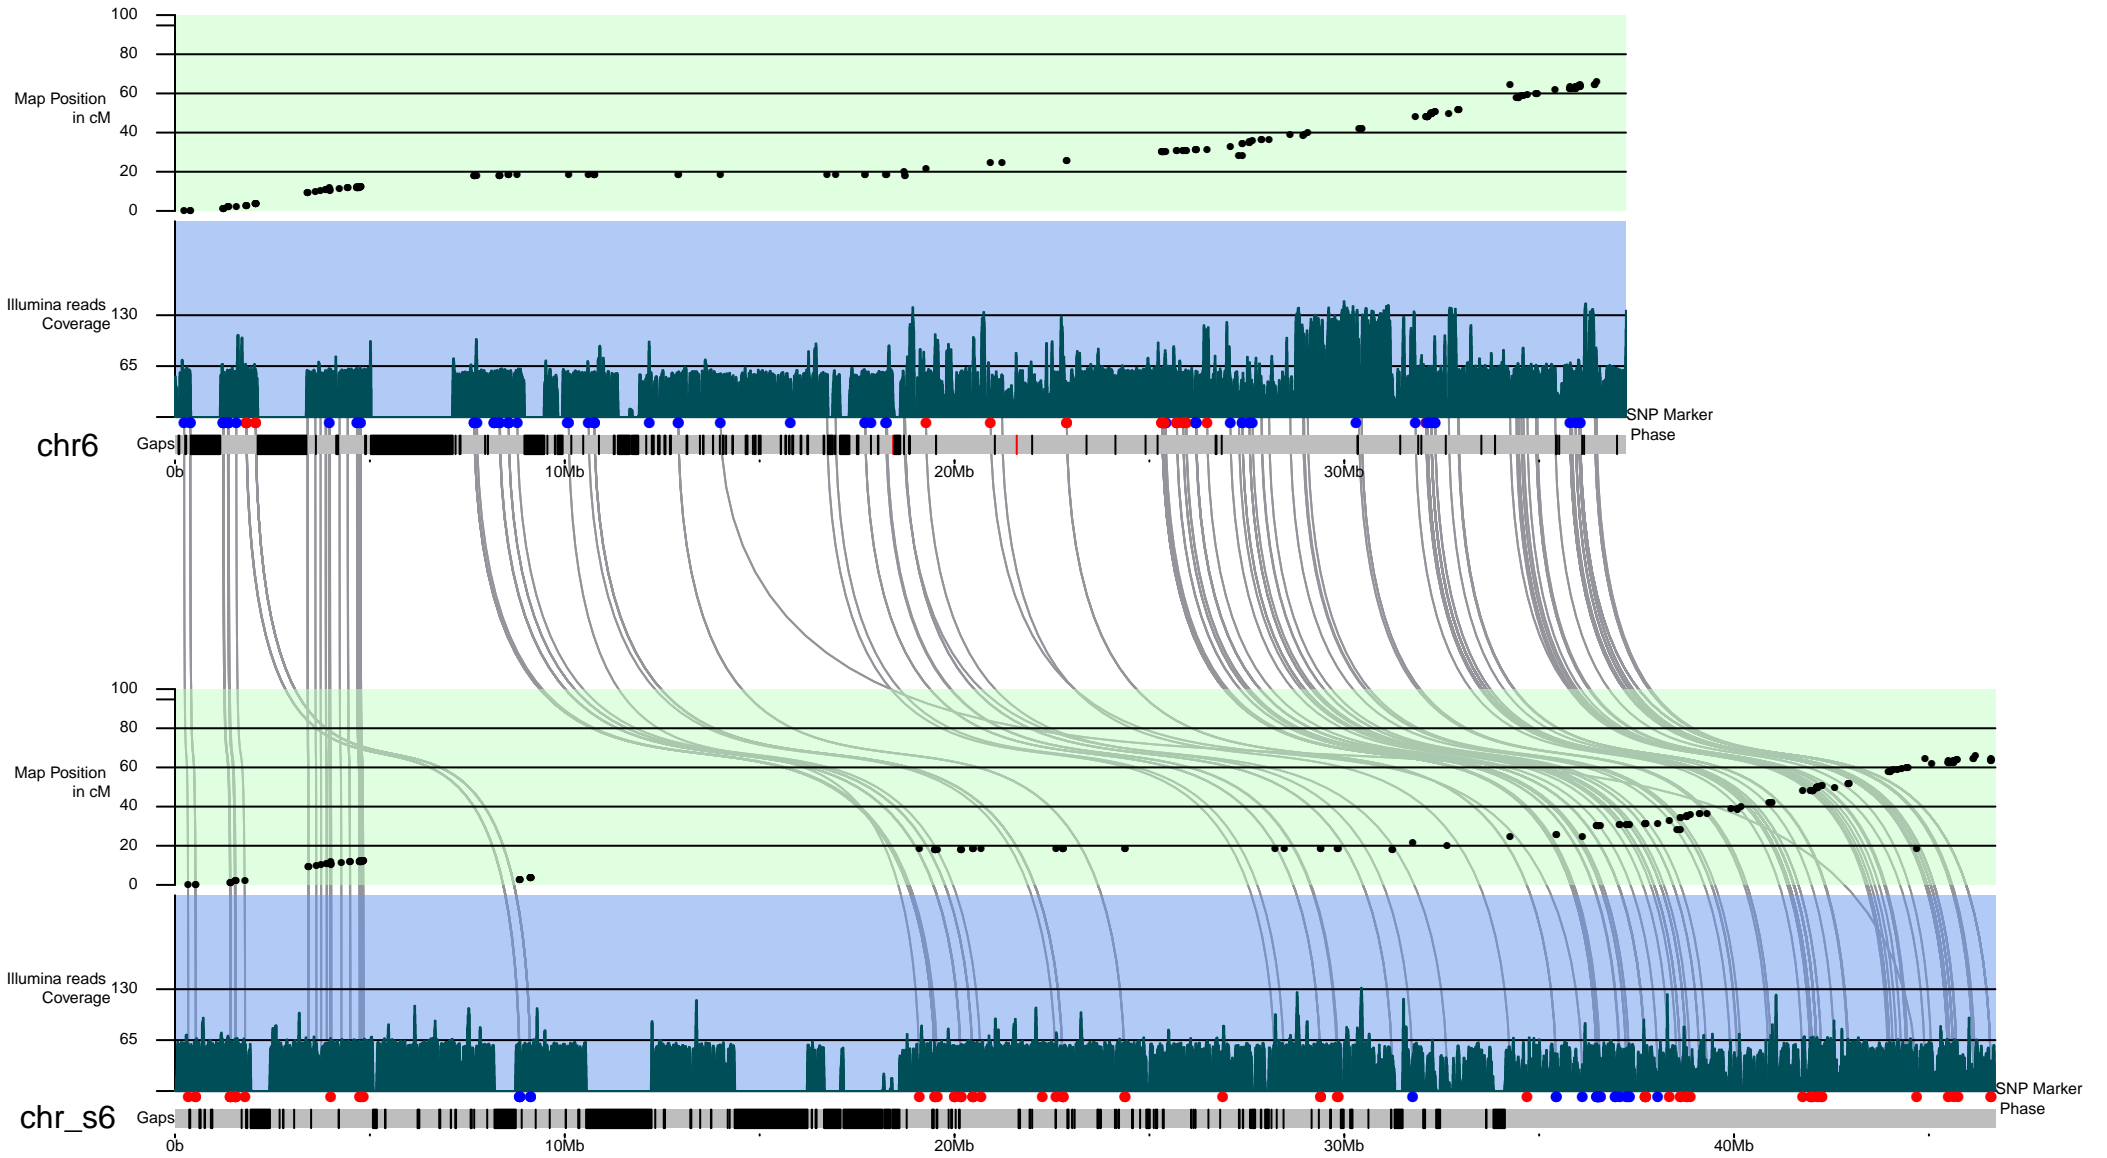

# Chr7.pdf

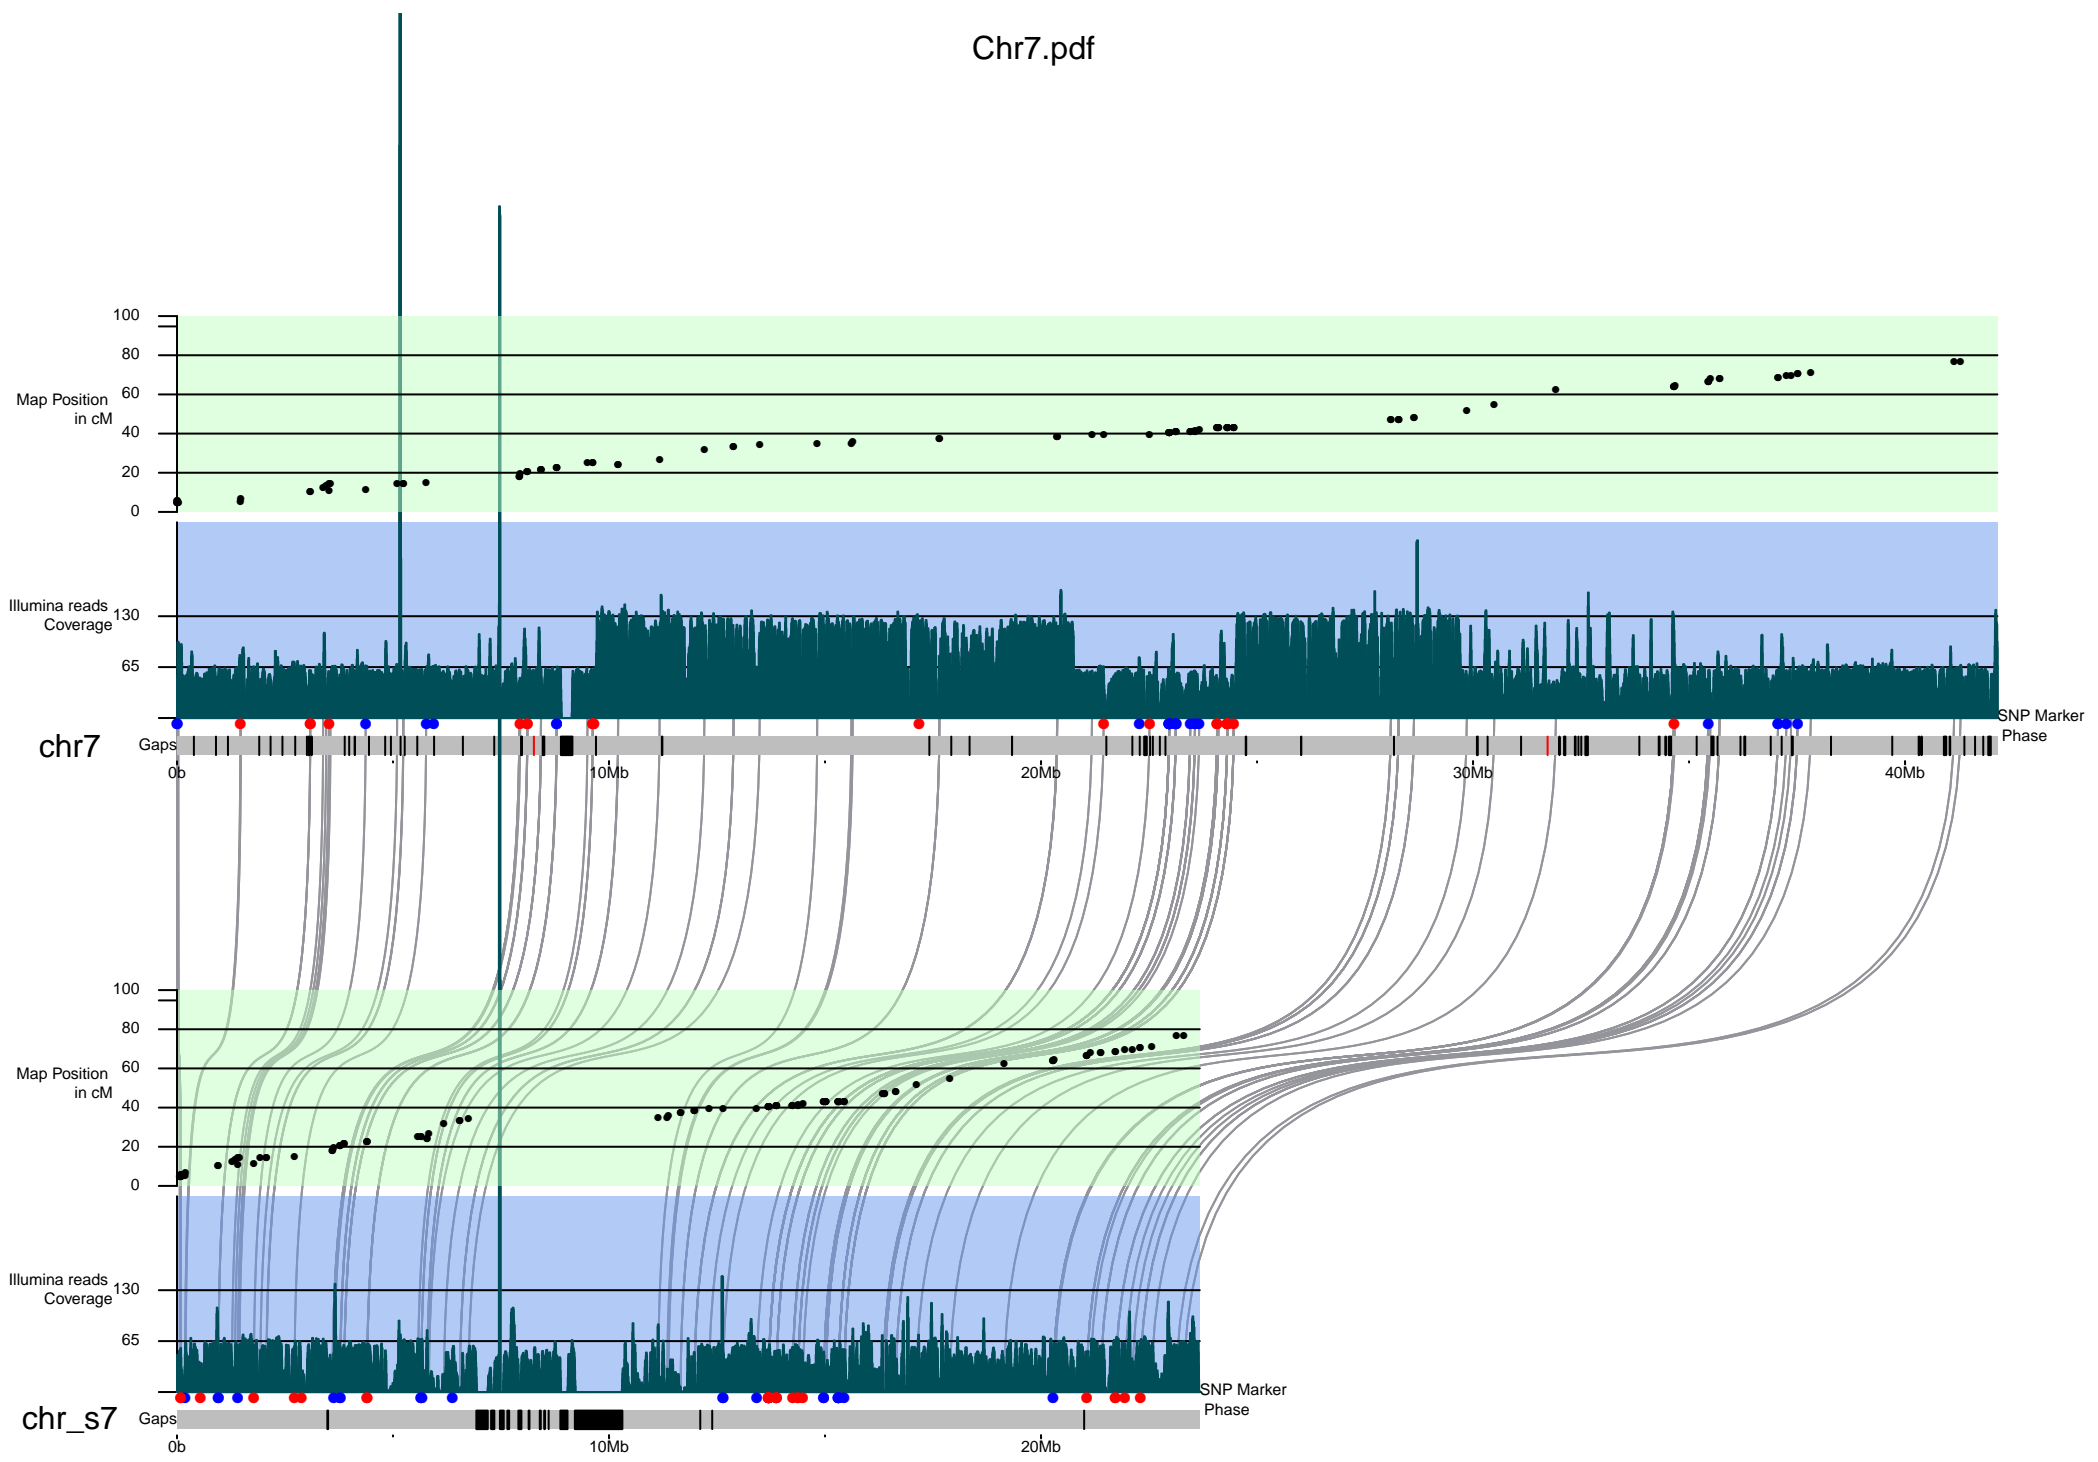

# Chr8.pdf

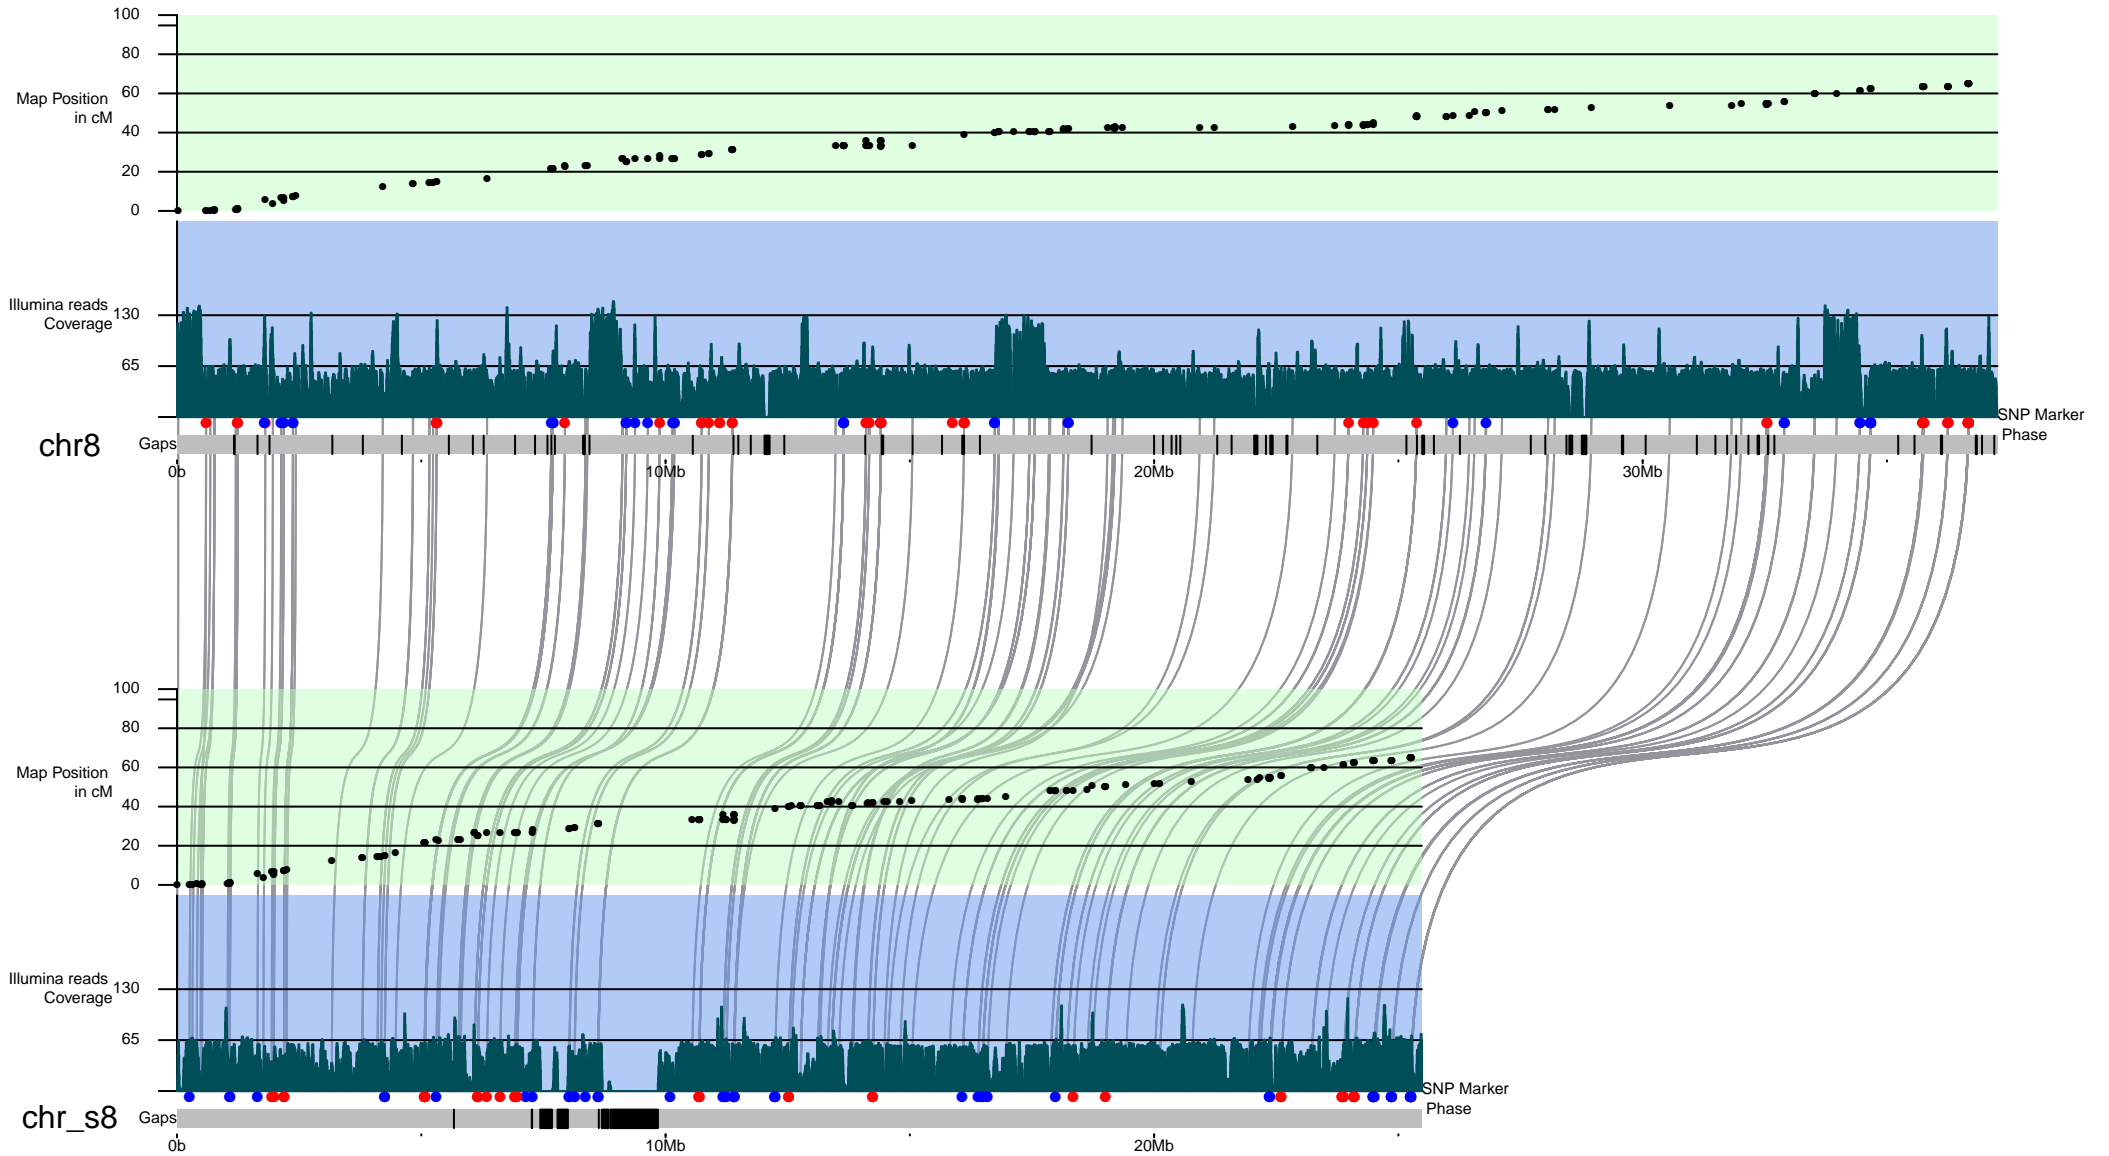



# Chr9.pdf

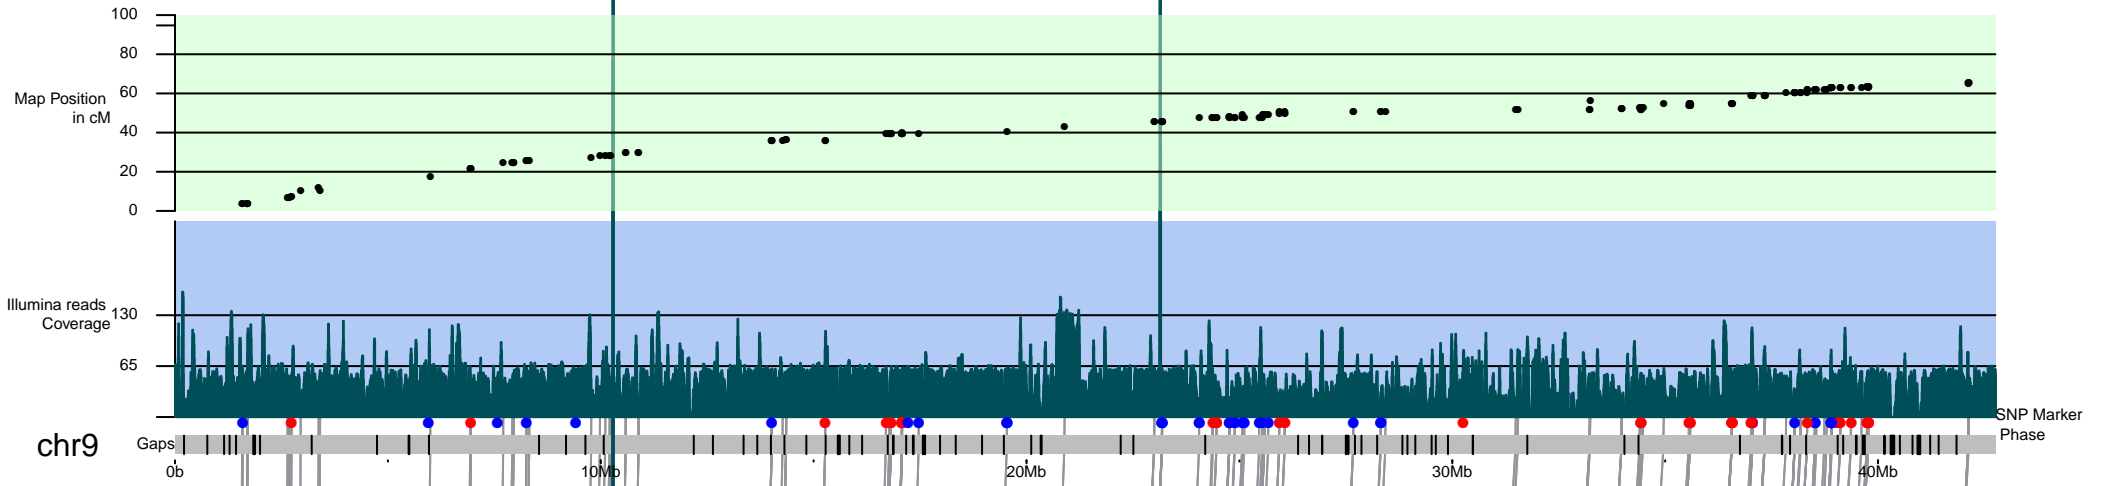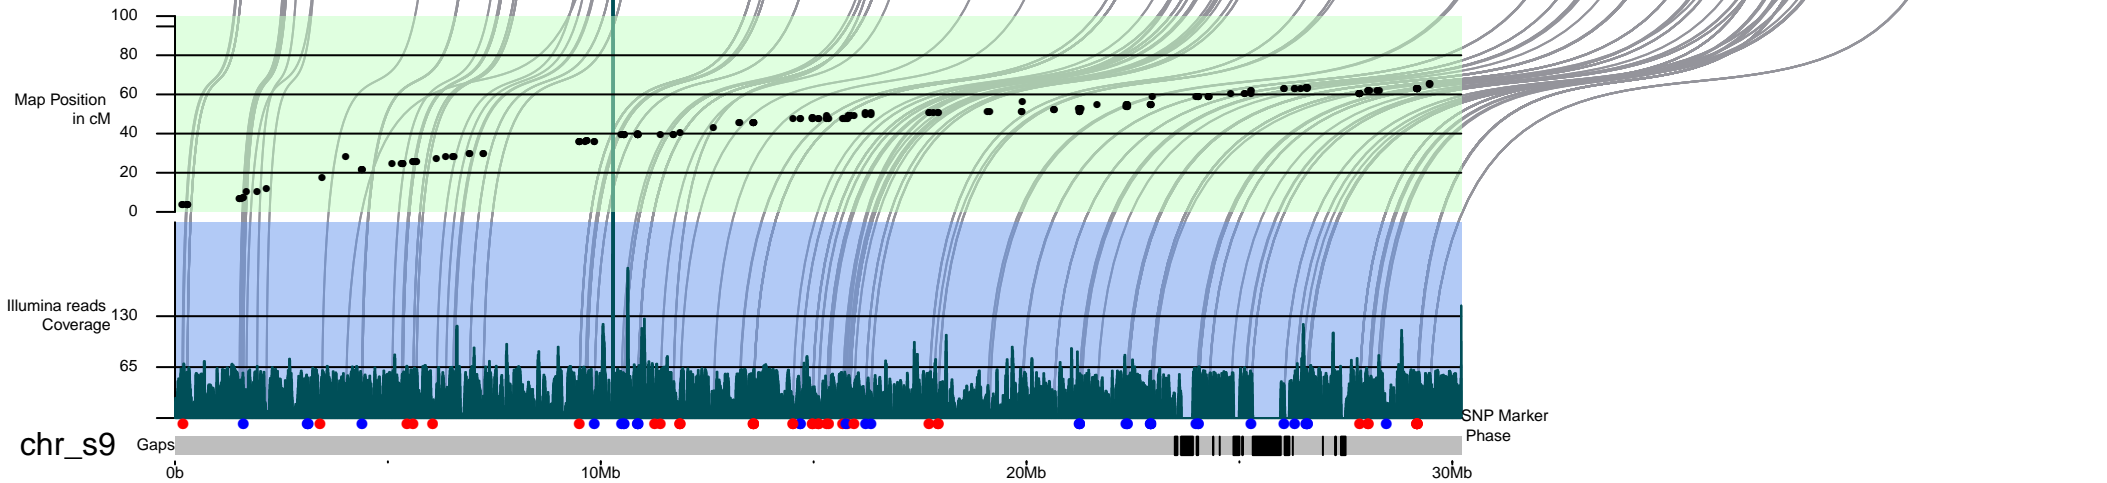

# Chr10.pdf

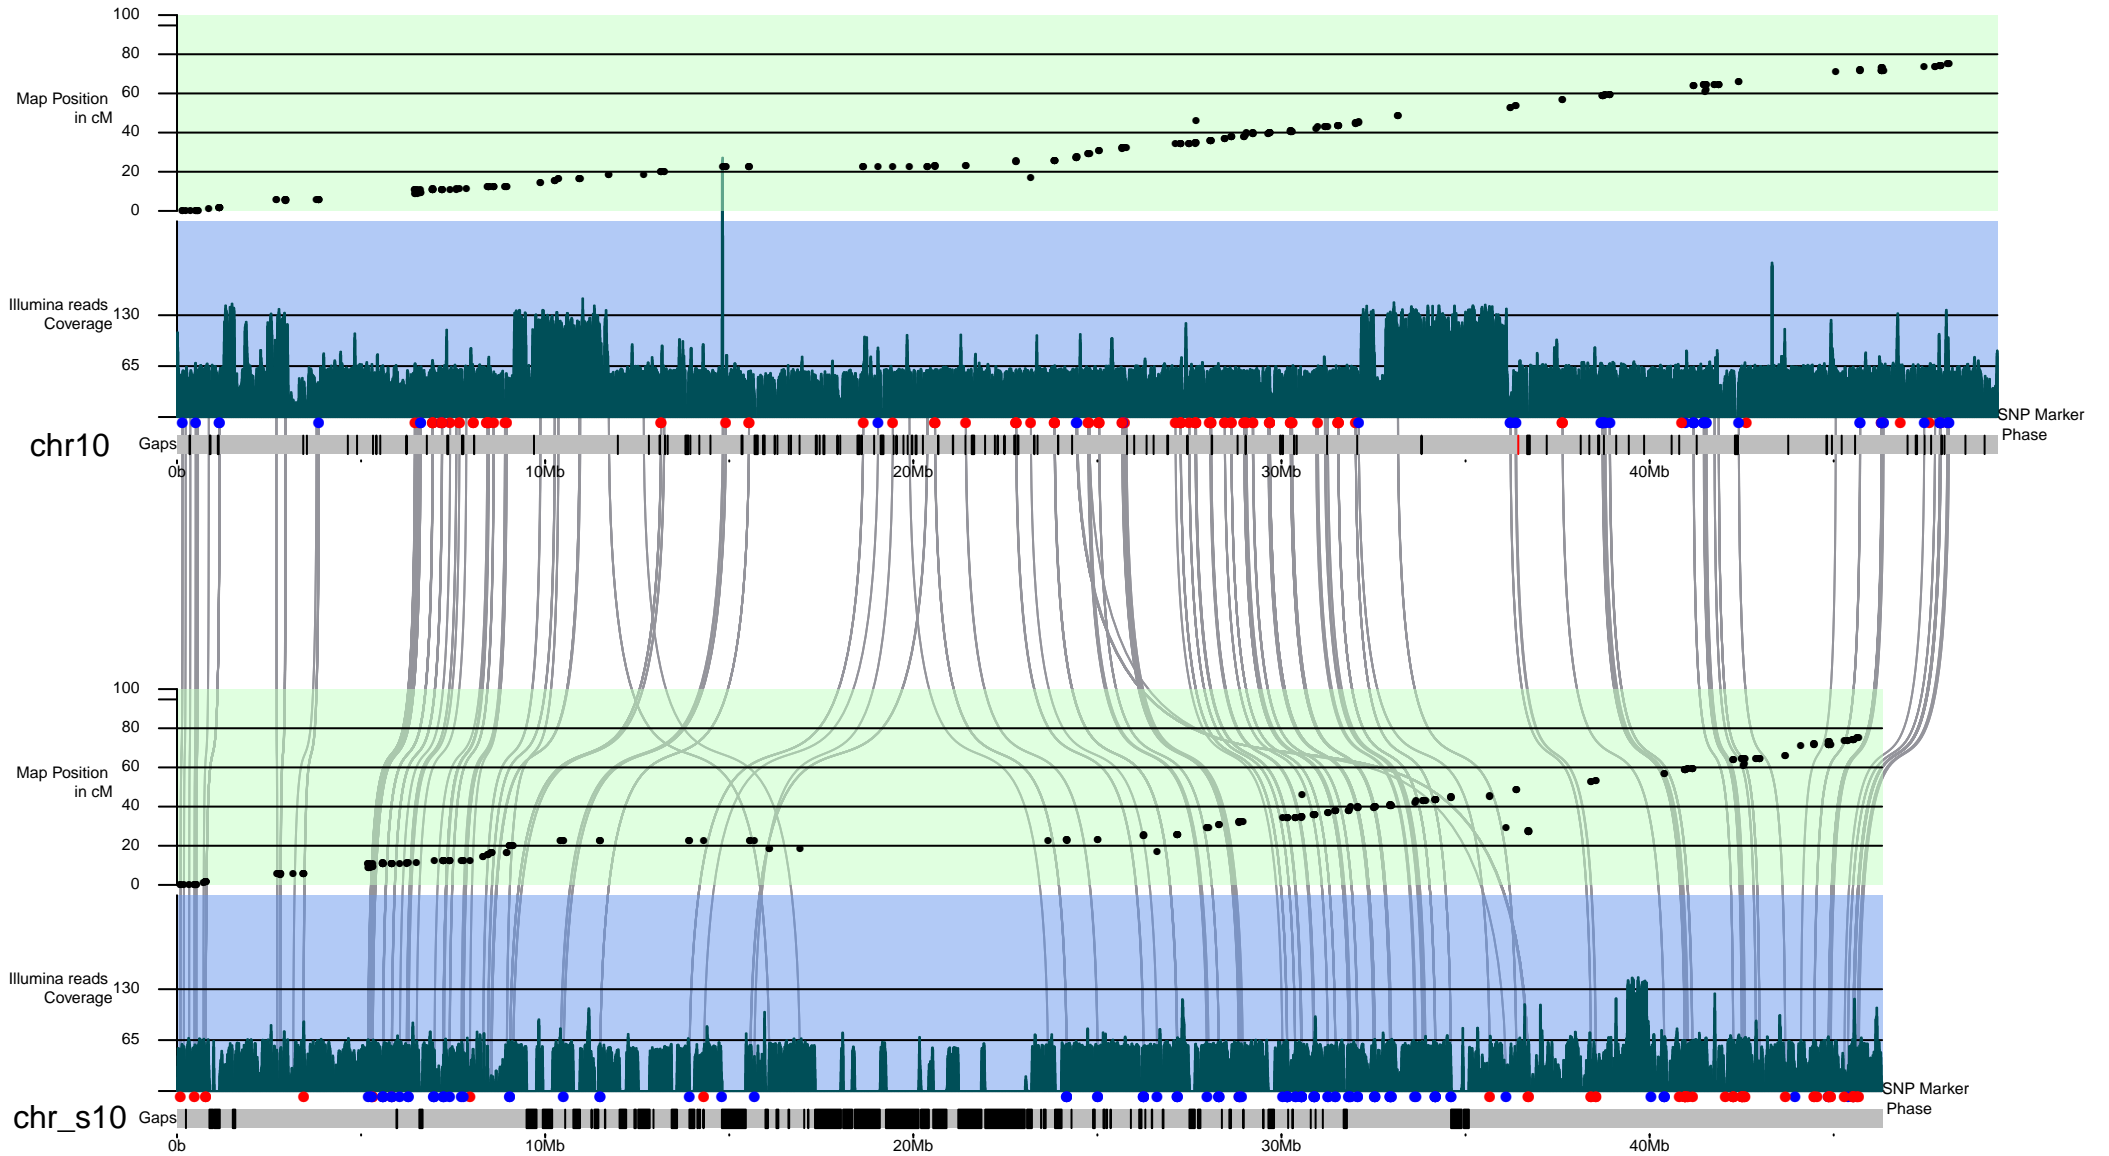

# Chr11.pdf

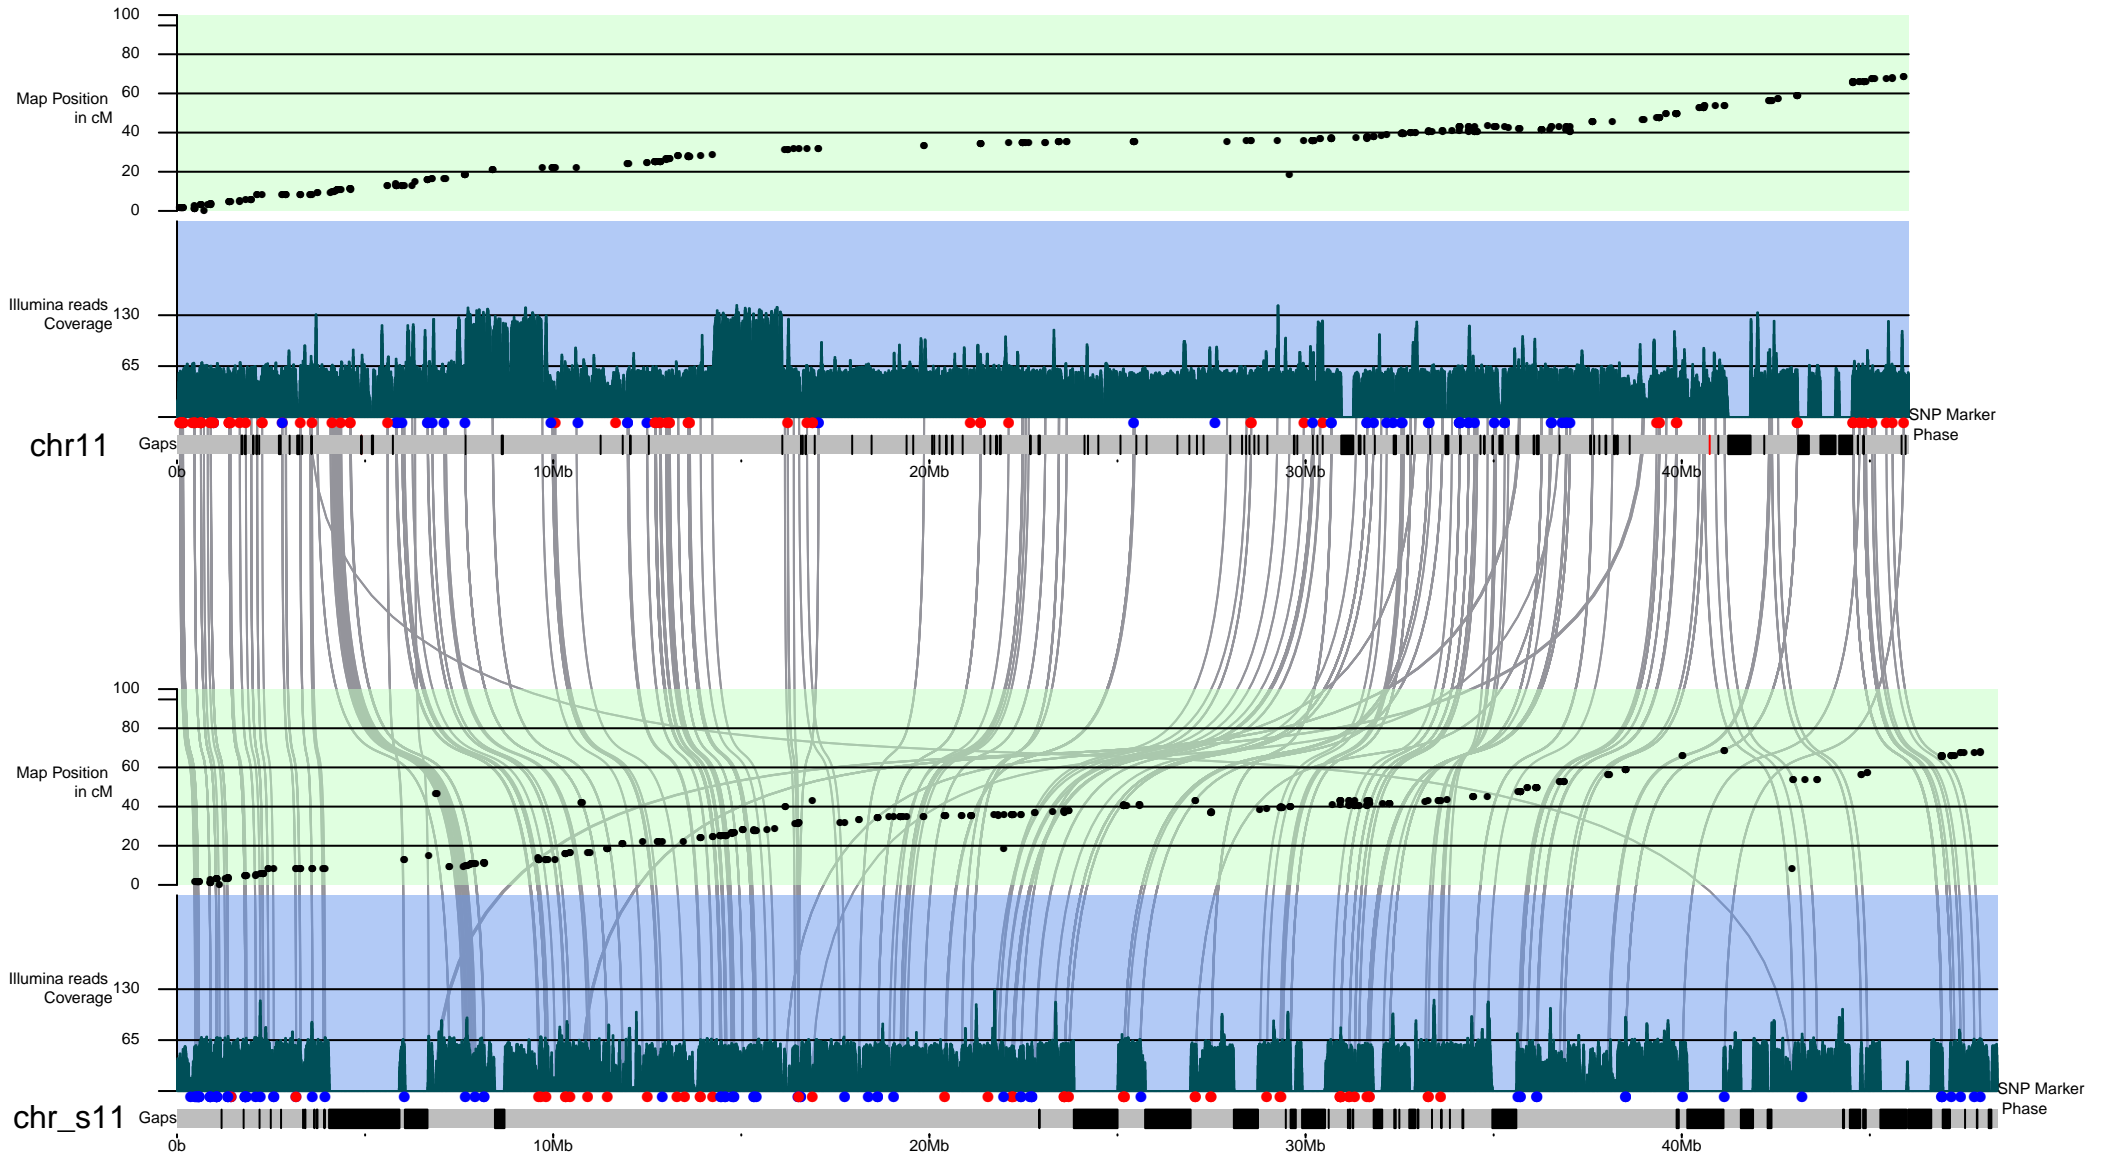

# Chr12.pdf

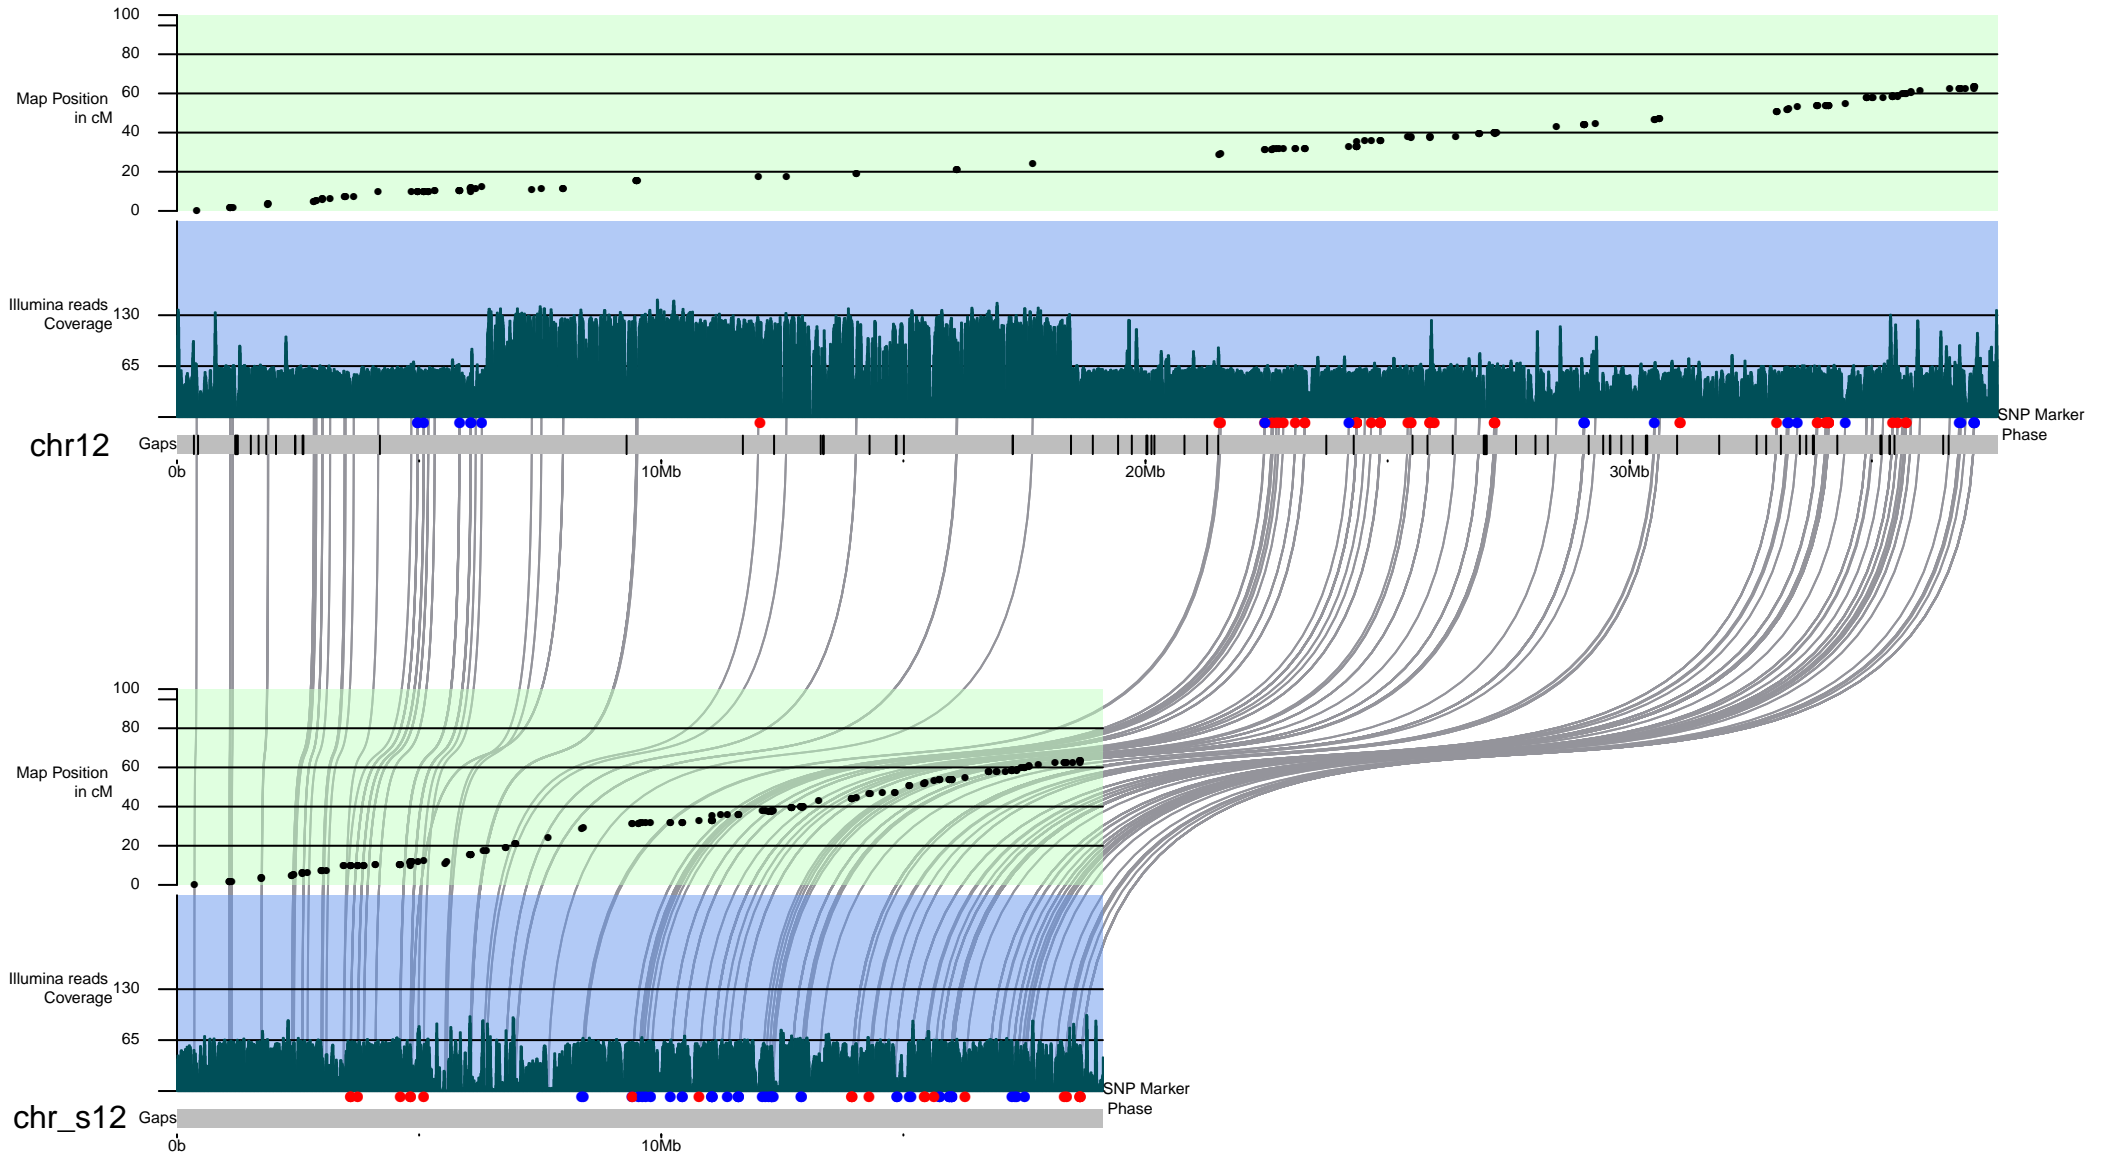

# Chr13.pdf

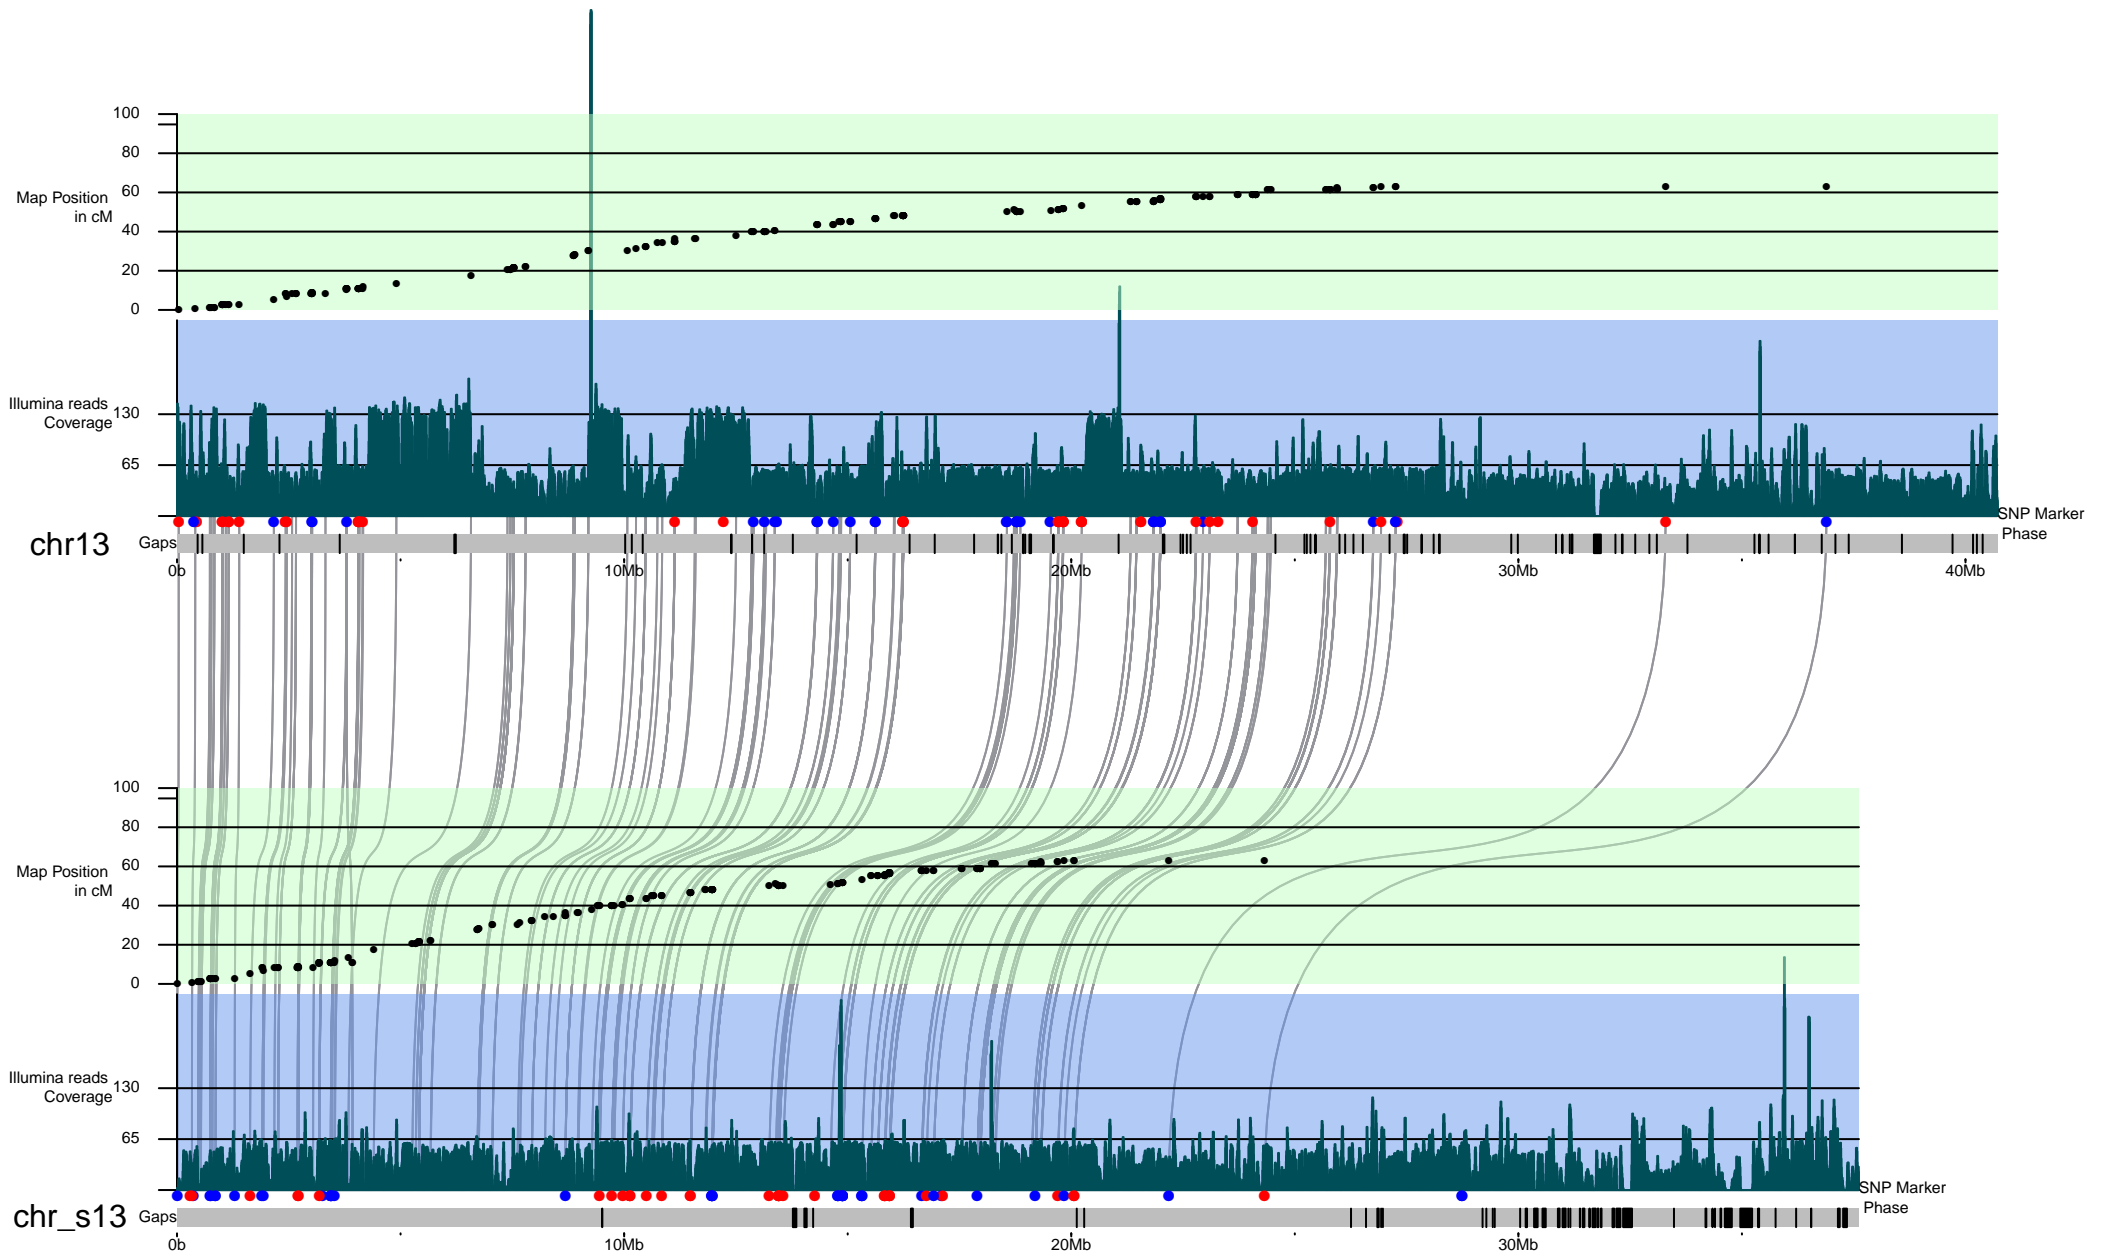

# Chr14.pdf

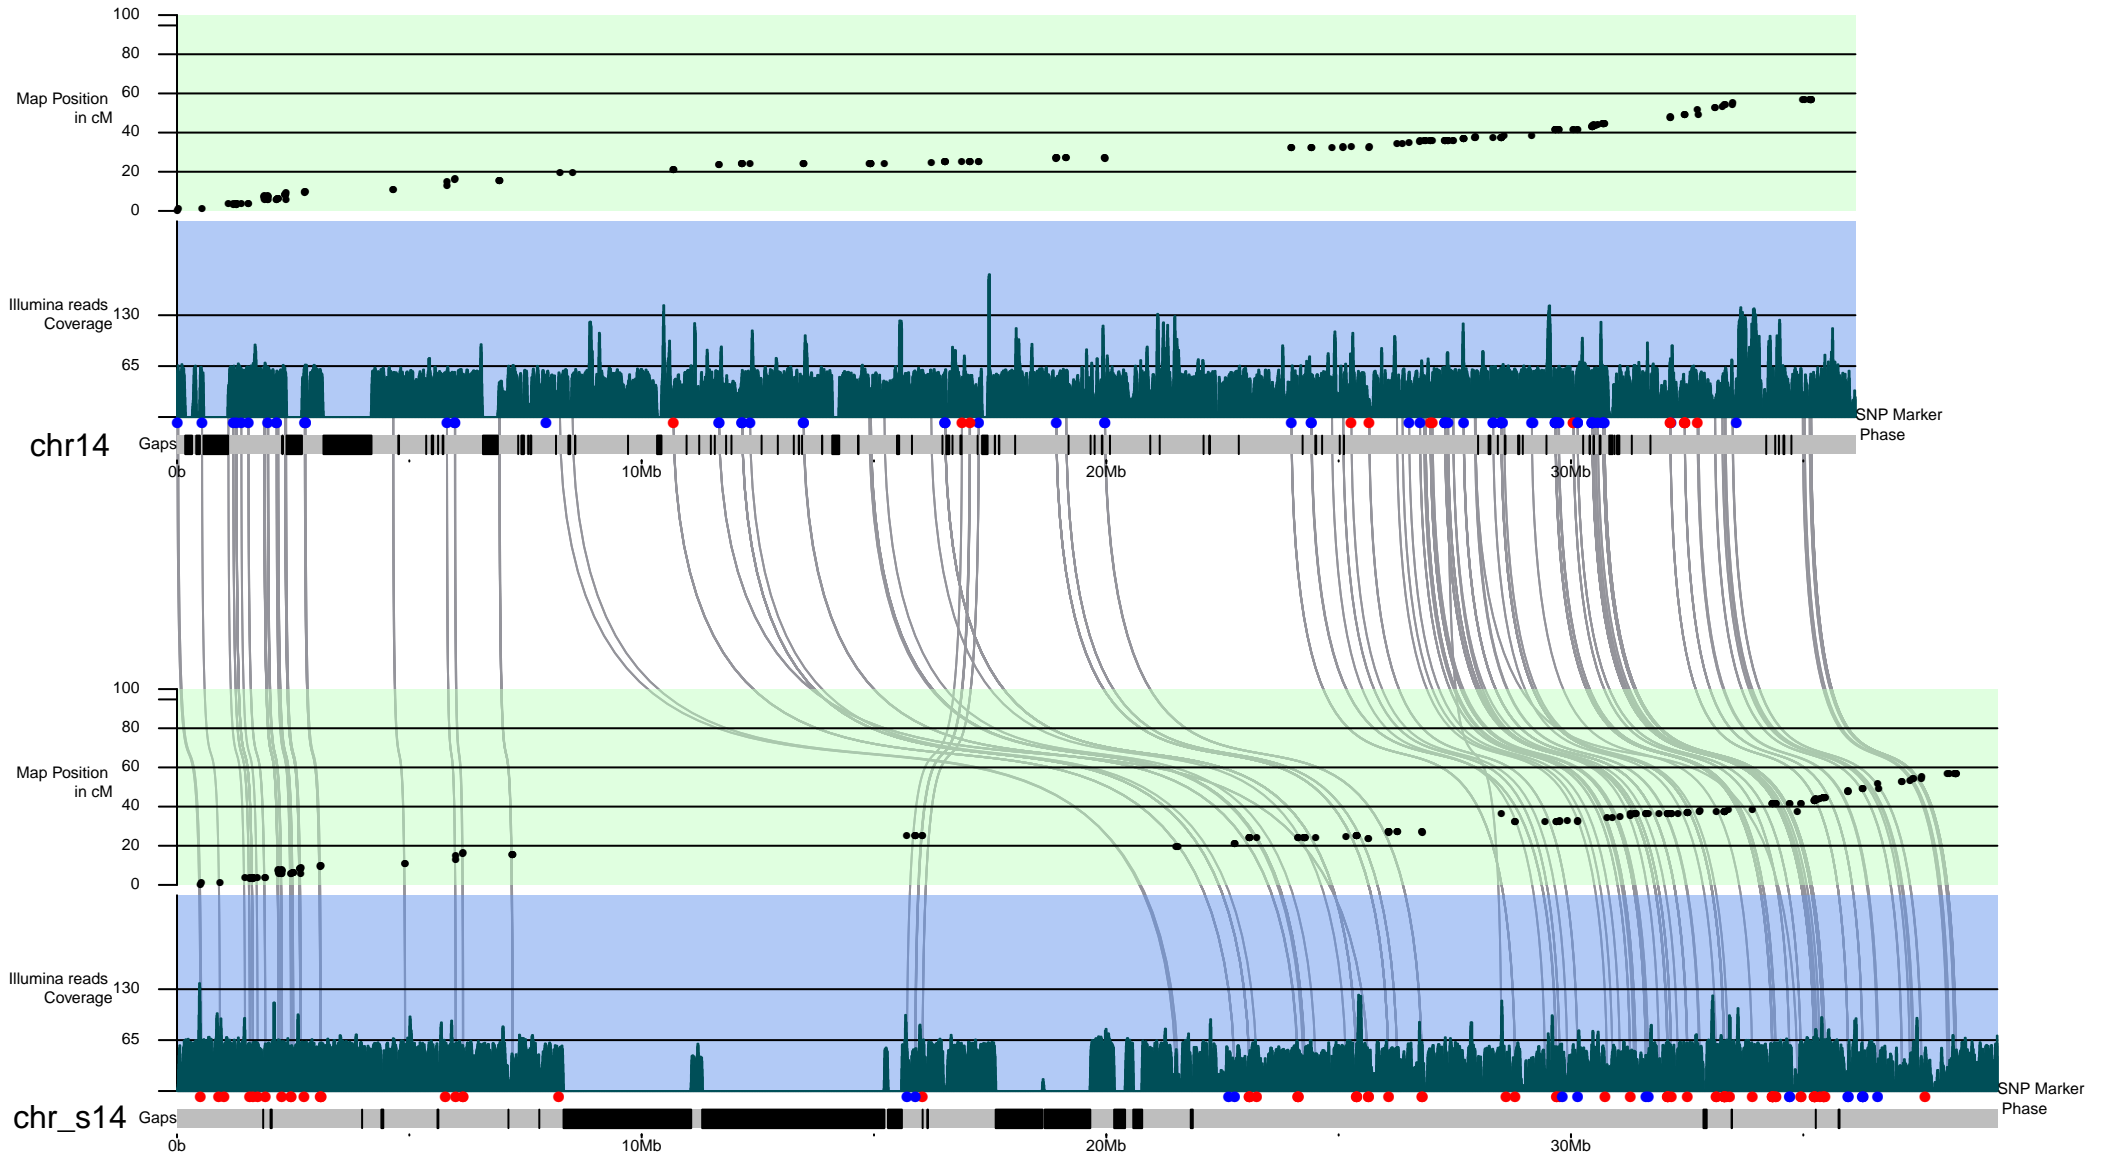

# Chr15.pdf

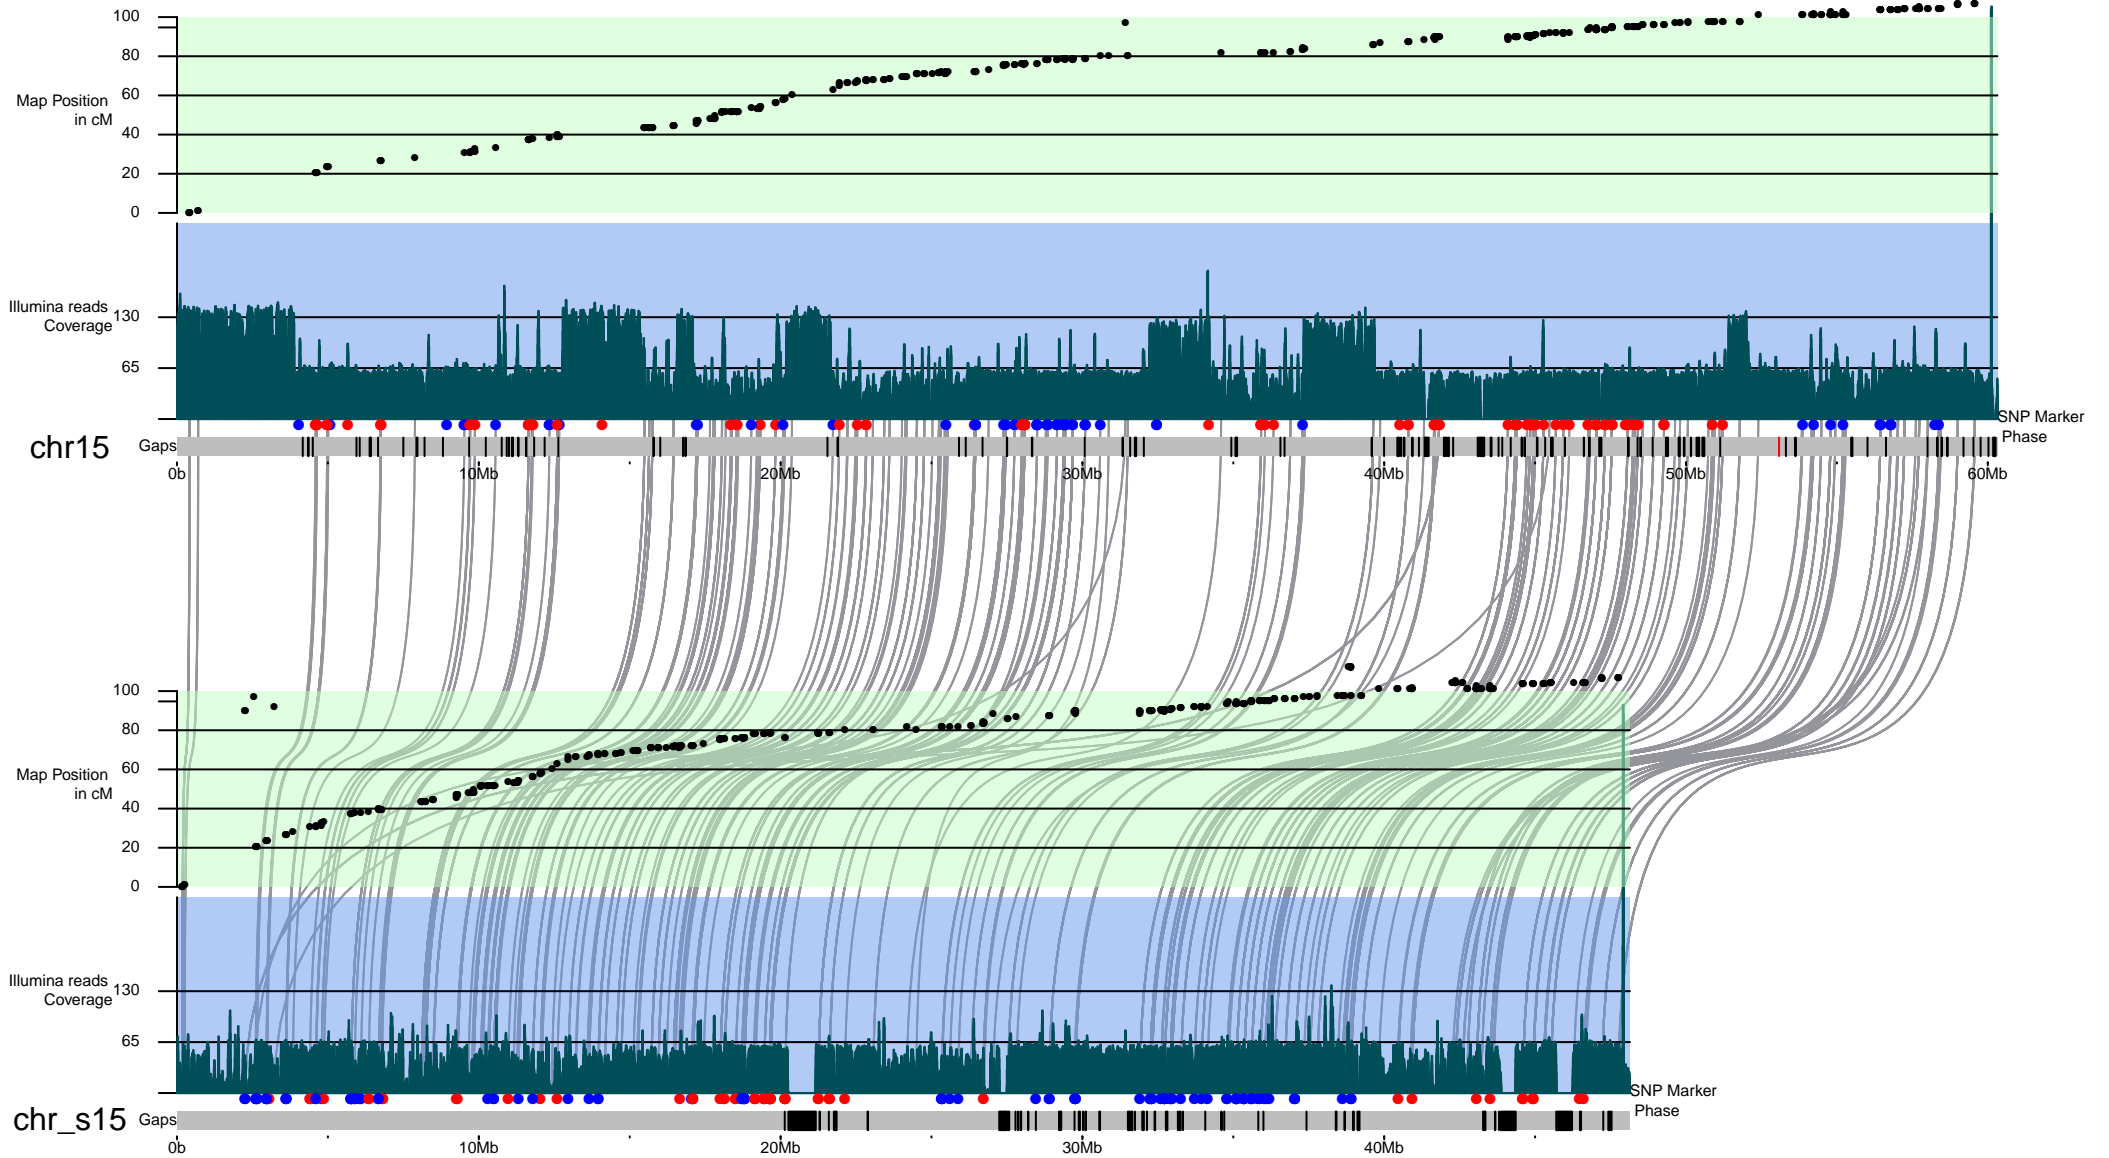

Chr16.pdf

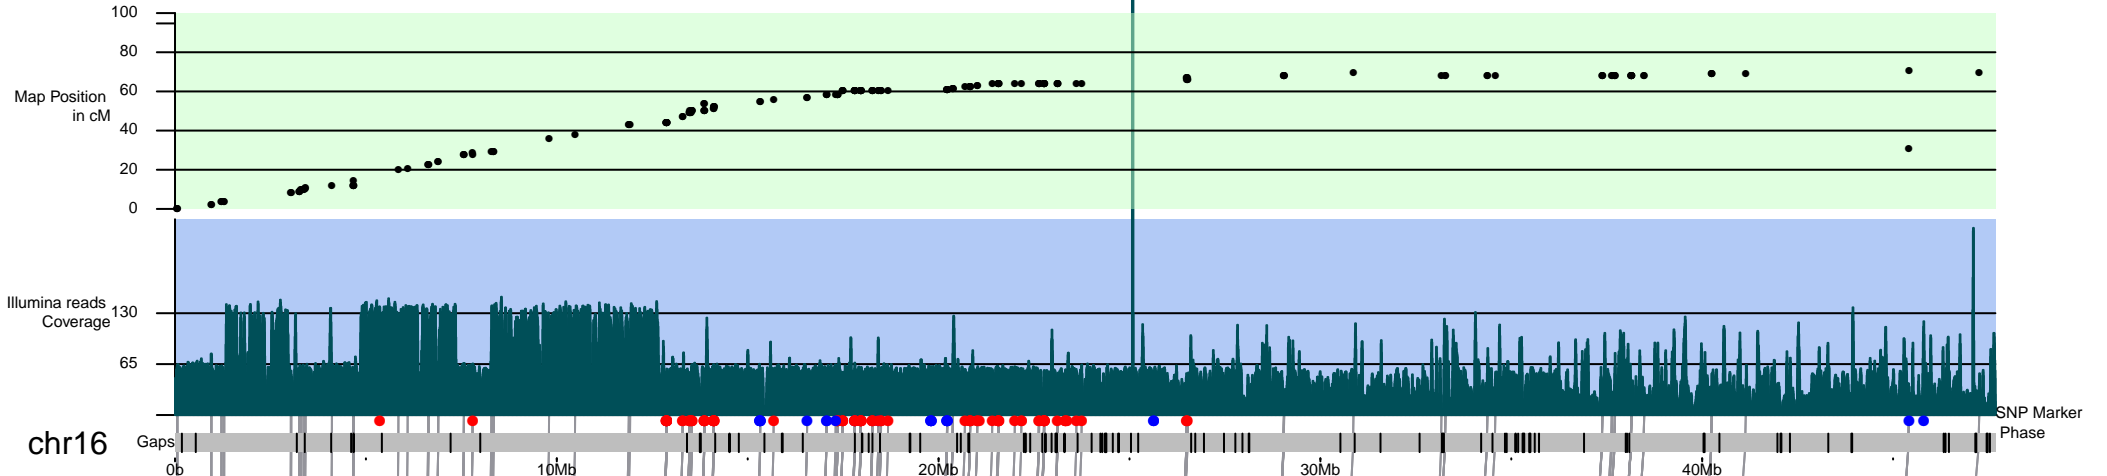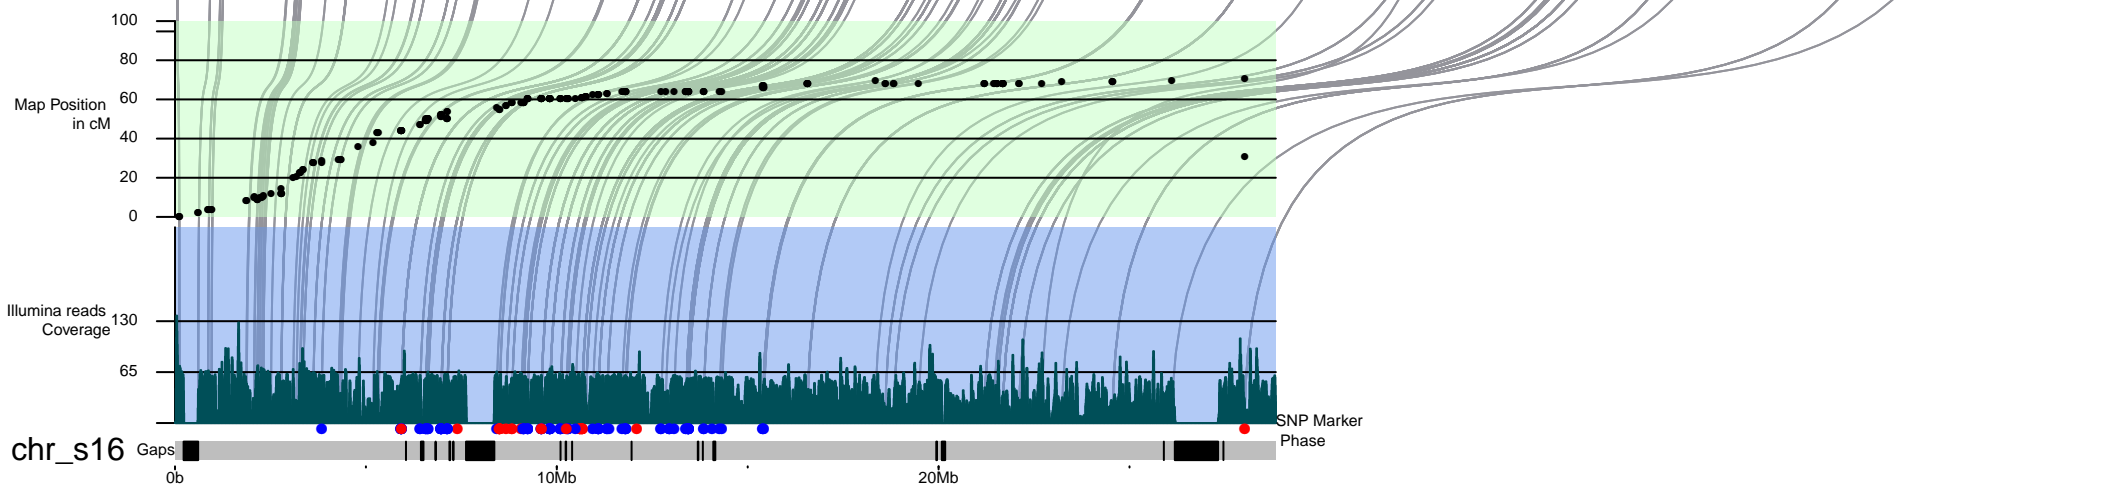



# Chr17.pdf

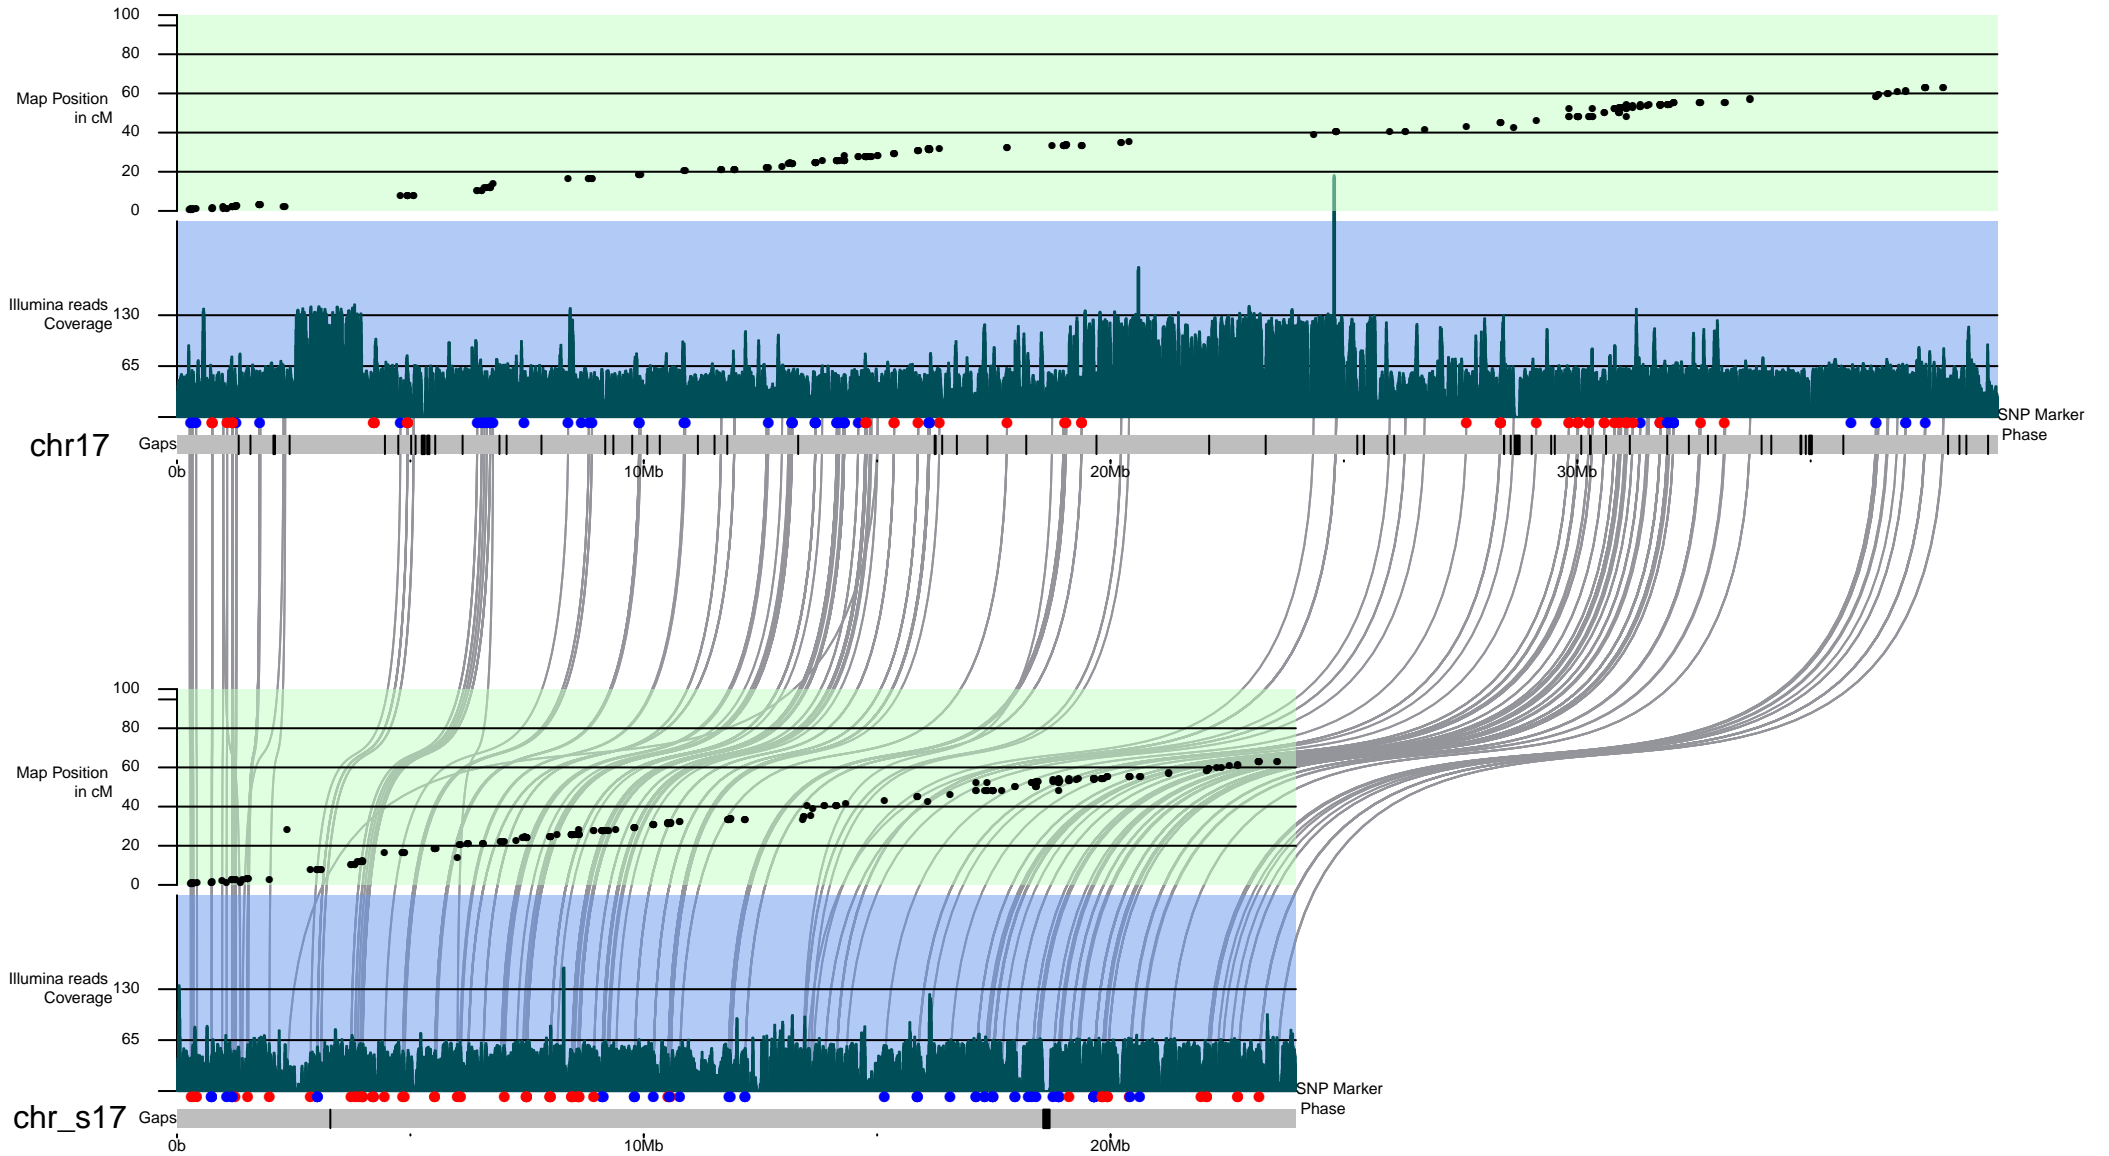

Supplement: Supplementary file [file media-1.pdf]
